# Supplementary material for: Effect of visual imagery in COVID-19 social media posts on users’ perception
Source: PeerJ journal article supplement (doi:10.7717/peerj-cs.1153), 2022-11-15
Supplement: PS1_Survey+Stimuli.zip [file PS1_Survey%2BStimuli.zip]

Survey Map

This survey is collecting data from you concerning the personal risk associated with browsing mobile-size social media posts about Covid-19. All questions are in the form of multiple-choice.

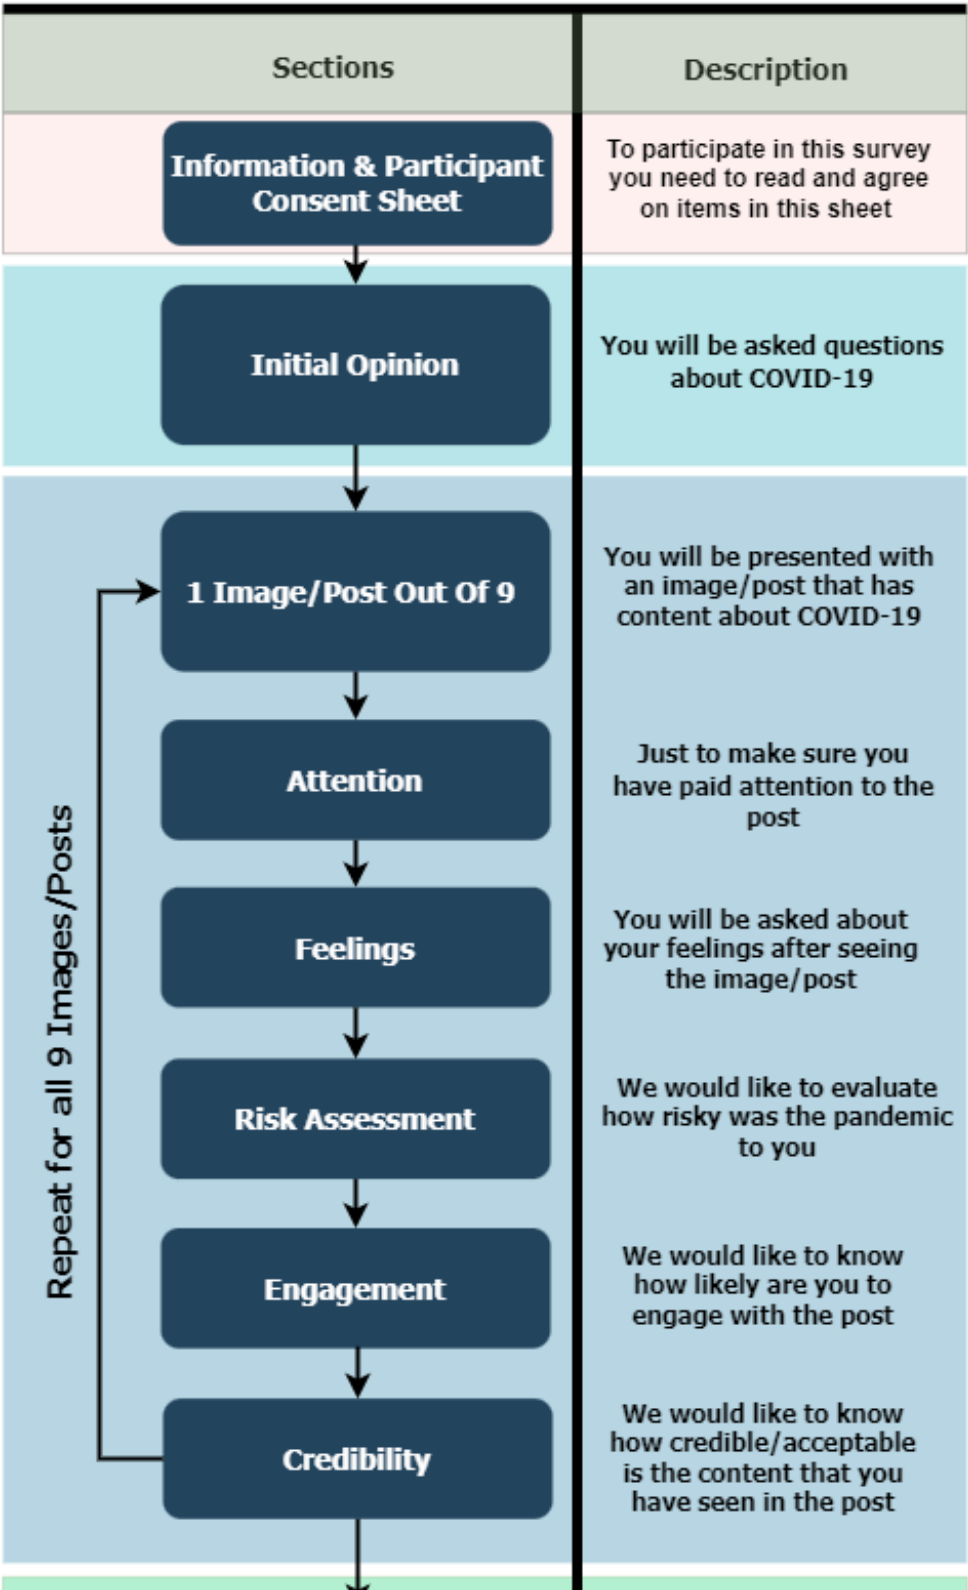

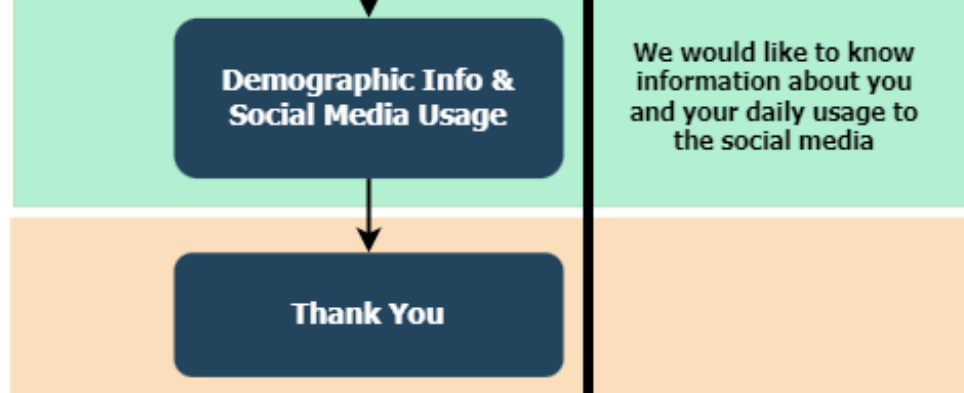

---

## Information and Participant Consent Sheet

Please tick each point when you read it and agree on it: \*

- ☐ **Purpose of the research:** Evaluating the associated personal risk when browsing mobile-size social media posts about Covid-19
- ☐ **Your role in this research:** if you decide to participate, you will complete a questionnaire based on your experience during the pandemic of Covid-19
- ☐ **Time Required:** The survey will take approximately 15 - 20 minutes to complete
- ☐ **Confidentiality:** Your responses will be kept anonymous. When research results are reported, responses will be aggregated (added together) and described in summary, with no single individual identifiable
- ☐ **Participation and Withdrawal:** Your participation would be highly appreciated. if you decide to participate, and you complete the survey, at the completion of the survey, you will get a reward code. You may refuse to participate or quite at any time and it is completely your choice
- ☐ **Repetition:** You may find some of the questions repetitive. However, due to the purpose of the research all questions must be answered
- ☐ **Attention:** You will be presented with 9 images/posts. Your attention and having a detailed look are required on each image/post before you proceed with the subsequent pages.

**To contact the researcher:** if you have any question or concerns about this research, please contact: Waleed Alnuwaiser, Email: [waleednw@gmail.com](mailto:waleednw@gmail.com)

---

## Initial Opinion Assessment

Do you find the COVID-19 pandemic important? \*

|                   | 1                     | 2                     | 3                     | 4                     | 5                     | 6                     | 7                     |                  |
|-------------------|-----------------------|-----------------------|-----------------------|-----------------------|-----------------------|-----------------------|-----------------------|------------------|
| <b>Not at all</b> | <input type="radio"/> | <b>Extremley</b> |

---

What is your opinion on news' reportage on COVID-19? \*

|                           | -3                    | -2                    | -1                    | 0                     | +1                    | +2                    | +3                    |                           |
|---------------------------|-----------------------|-----------------------|-----------------------|-----------------------|-----------------------|-----------------------|-----------------------|---------------------------|
| <b>Extremely Negative</b> | <input type="radio"/> | <b>Extremely Positive</b> |

---

Have you been vaccinated against COVID-19? \*

|                       |                       |
|-----------------------|-----------------------|
| Yes                   | No                    |
| <input type="radio"/> | <input type="radio"/> |

---

## Image/Post

Please have a detailed look at the following image/post and tick 'I am done' when you finish:

\*

☐ I am done

---

## Attention test

Which human organ was presented in the last picture? \*

- ☐ Lungs
  - ☐ Heart
  - ☐ Stomach
  - ☐ Kidneys
- 

## Feelings

Rate how positive or negative this post made you feel, ranging from 'sad' to 'happy':

\*

|     |                                                                                   |                       |                       |                                                                                   |                       |                       |                                                                                   |                       |                       |                                                                                     |  |  |                                                                                     |       |
|-----|-----------------------------------------------------------------------------------|-----------------------|-----------------------|-----------------------------------------------------------------------------------|-----------------------|-----------------------|-----------------------------------------------------------------------------------|-----------------------|-----------------------|-------------------------------------------------------------------------------------|--|--|-------------------------------------------------------------------------------------|-------|
|     |  |                       |                       |  |                       |                       |  |                       |                       |  |  |  |  |       |
|     | 1                                                                                 | 2                     | 3                     | 4                                                                                 | 5                     | 6                     | 7                                                                                 | 8                     | 9                     |                                                                                     |  |  |                                                                                     |       |
| Sad | <input type="radio"/>                                                             | <input type="radio"/> | <input type="radio"/> | <input type="radio"/>                                                             | <input type="radio"/> | <input type="radio"/> | <input type="radio"/>                                                             | <input type="radio"/> | <input type="radio"/> |                                                                                     |  |  | <input type="radio"/>                                                               | Happy |

Rate how energetic this post made you feel, ranging from 'sleepy/apathetic' to 'excited/energetic': \*

|                  |                                                                                   |                       |                       |                                                                                   |                       |                       |                                                                                   |                       |                       |                                                                                     |  |  |                                                                                     |         |
|------------------|-----------------------------------------------------------------------------------|-----------------------|-----------------------|-----------------------------------------------------------------------------------|-----------------------|-----------------------|-----------------------------------------------------------------------------------|-----------------------|-----------------------|-------------------------------------------------------------------------------------|--|--|-------------------------------------------------------------------------------------|---------|
|                  |  |                       |                       |  |                       |                       |  |                       |                       |  |  |  |  |         |
|                  | 1                                                                                 | 2                     | 3                     | 4                                                                                 | 5                     | 6                     | 7                                                                                 | 8                     | 9                     |                                                                                     |  |  |                                                                                     |         |
| Sleepy/Apathetic | <input type="radio"/>                                                             | <input type="radio"/> | <input type="radio"/> | <input type="radio"/>                                                             | <input type="radio"/> | <input type="radio"/> | <input type="radio"/>                                                             | <input type="radio"/> | <input type="radio"/> |                                                                                     |  |  | <input type="radio"/>                                                               | Excited |

Rate how in control of the situation this post made you feel, ranging from 'no control' to 'completely in control': \*

|            |                                                                                   |                       |                       |                                                                                   |                       |                       |                                                                                   |                       |                       |                                                                                    |  |  |                                                                                     |                       |
|------------|-----------------------------------------------------------------------------------|-----------------------|-----------------------|-----------------------------------------------------------------------------------|-----------------------|-----------------------|-----------------------------------------------------------------------------------|-----------------------|-----------------------|------------------------------------------------------------------------------------|--|--|-------------------------------------------------------------------------------------|-----------------------|
|            |  |                       |                       |  |                       |                       |  |                       |                       |  |  |  |  |                       |
|            | 1                                                                                 | 2                     | 3                     | 4                                                                                 | 5                     | 6                     | 7                                                                                 | 8                     | 9                     |                                                                                    |  |  |                                                                                     |                       |
| No control | <input type="radio"/>                                                             | <input type="radio"/> | <input type="radio"/> | <input type="radio"/>                                                             | <input type="radio"/> | <input type="radio"/> | <input type="radio"/>                                                             | <input type="radio"/> | <input type="radio"/> |                                                                                    |  |  | <input type="radio"/>                                                               | Completely in control |

## Risk Assessment

After seeing this news post, how much anxiety do you feel in regards to the COVID-19 pandemic?\*

|                   |                       |                       |                       |                       |                       |                   |
|-------------------|-----------------------|-----------------------|-----------------------|-----------------------|-----------------------|-------------------|
|                   | 1                     | 2                     | 3                     | 4                     | 5                     |                   |
| No anxiety at all | <input type="radio"/> | Very high anxiety |

After seeing the news post, how big of a risk do you think the COVID-19 pandemic poses to you or your family?\*

|                |                       |                       |                       |                       |                       |                |
|----------------|-----------------------|-----------------------|-----------------------|-----------------------|-----------------------|----------------|
|                | 1                     | 2                     | 3                     | 4                     | 5                     |                |
| No risk at all | <input type="radio"/> | Very high risk |

**\***

After seeing the news post, what do you think is your likelihood of infection?

After seeing the news post, how harmful do you think it would be if you got infected?\*

## Credibility

|                                                  |                       |                       |                       |                       |                       |                |
|--------------------------------------------------|-----------------------|-----------------------|-----------------------|-----------------------|-----------------------|----------------|
| ...separates facts from opinion *                |                       |                       |                       |                       |                       |                |
|                                                  | 1                     | 2                     | 3                     | 4                     | 5                     |                |
| Strongly disagree                                | <input type="radio"/> | Strongly agree |
| ...is factual *                                  |                       |                       |                       |                       |                       |                |
|                                                  | 1                     | 2                     | 3                     | 4                     | 5                     |                |
| Strongly disagree                                | <input type="radio"/> | Strongly agree |
| ...tells the whole story *                       |                       |                       |                       |                       |                       |                |
|                                                  | 1                     | 2                     | 3                     | 4                     | 5                     |                |
| Strongly disagree                                | <input type="radio"/> | Strongly agree |
| ...is accurate *                                 |                       |                       |                       |                       |                       |                |
|                                                  | 1                     | 2                     | 3                     | 4                     | 5                     |                |
| Strongly disagree                                | <input type="radio"/> | Strongly agree |
| ...is unbiased *                                 |                       |                       |                       |                       |                       |                |
|                                                  | 1                     | 2                     | 3                     | 4                     | 5                     |                |
| Strongly disagree                                | <input type="radio"/> | Strongly agree |
| ...is fair *                                     |                       |                       |                       |                       |                       |                |
|                                                  | 1                     | 2                     | 3                     | 4                     | 5                     |                |
| Strongly disagree                                | <input type="radio"/> | Strongly agree |
| ... demonstrates concern about public interest * |                       |                       |                       |                       |                       |                |
|                                                  | 1                     | 2                     | 3                     | 4                     | 5                     |                |
| Strongly disagree                                | <input type="radio"/> | Strongly agree |

|                   |                       |                       |                       |                       |                       |                |
|-------------------|-----------------------|-----------------------|-----------------------|-----------------------|-----------------------|----------------|
|                   | 1                     | 2                     | 3                     | 4                     | 5                     |                |
| Strongly disagree | <input type="radio"/> | Strongly agree |

|                   |                       |                       |                       |                       |                       |                |
|-------------------|-----------------------|-----------------------|-----------------------|-----------------------|-----------------------|----------------|
|                   | 1                     | 2                     | 3                     | 4                     | 5                     |                |
| Strongly disagree | <input type="radio"/> | Strongly agree |

☐ I am done

- ☐ Red and Blue/Gey
- ☐ Yellow and Red
- ☐ Black and White
- ☐ Purple and Pink

# Happy

Rate how energetic this post made you feel, ranging from 'sleepy/apathetic' to 'excited/energetic' : \*







1      2      3      4      5      6      7      8      9

**Sleepy/Apathetic**                                                **Excited**

Rate how in control of the situation this post made you feel, ranging from 'no control' to 'completely in control': \*

Figure 1: A 9-point Likert scale for the degree of control over the environment. The scale is represented by a horizontal row of nine circles, with the first circle on the left labeled "No control" and the last circle on the right labeled "Completely in control". Above the circles, a series of nine icons illustrates the progression of control. The icons are: 1. A small robot in a square box. 2. A small robot in a square box. 3. A small robot in a square box. 4. A small robot in a square box. 5. A small robot in a square box. 6. A small robot in a square box. 7. A small robot in a square box. 8. A small robot in a square box. 9. A small robot in a square box.

## Risk Assessment

After seeing this news post, how much anxiety do you feel in regards to the COVID-19 pandemic?\*

|                          | 1                     | 2                     | 3                     | 4                     | 5                     |                          |
|--------------------------|-----------------------|-----------------------|-----------------------|-----------------------|-----------------------|--------------------------|
| <b>No anxiety at all</b> | <input type="radio"/> | <b>Very high anxiety</b> |

After seeing the news post, how big of a risk do you think the COVID-19 pandemic poses to you or your family?\*

|                | 1 | 2 | 3 | 4 | 5 |                |
|----------------|---|---|---|---|---|----------------|
| No risk at all |   |   |   |   |   | Very high risk |

Where 'dread' means to be in terror of, or fear intensely, how much do you dread the COVID-19 pandemic after seeing this news post?

\*

|                 |                       |                       |                       |                       |                       |                 |
|-----------------|-----------------------|-----------------------|-----------------------|-----------------------|-----------------------|-----------------|
|                 | 1                     | 2                     | 3                     | 4                     | 5                     |                 |
| No dread at all | <input type="radio"/> | Very high dread |

After seeing the news post, what do you think is your likelihood of infection?\*

Very unlikely 1 2 3 4 5 Very likely



|                                   |                       |                       |                       |                       |                       |                         |
|-----------------------------------|-----------------------|-----------------------|-----------------------|-----------------------|-----------------------|-------------------------|
|                                   | 1                     | 2                     | 3                     | 4                     | 5                     |                         |
| <b>Not<br/>harmful at<br/>all</b> | <input type="radio"/> | <b>Very<br/>harmful</b> |

**Are you likely to... (check where applicable)?\***

- ☐ Share the post
- ☐ Read the post
- ☐ Comment on the post
- ☐ Ignore the post

... can be trusted \*

[illegible]

...separates facts from opinion \*

|                          |   |   |   |   |   |                       |
|--------------------------|---|---|---|---|---|-----------------------|
|                          | 1 | 2 | 3 | 4 | 5 |                       |
| <b>Strongly disagree</b> |   |   |   |   |   | <b>Strongly agree</b> |

...is factual \*

|                          | 1                     | 2                     | 3                     | 4                     | 5                     |                       |
|--------------------------|-----------------------|-----------------------|-----------------------|-----------------------|-----------------------|-----------------------|
| <b>Strongly disagree</b> | <input type="radio"/> | <b>Strongly agree</b> |

|                                                  |                       |                       |                       |                       |                       |                |
|--------------------------------------------------|-----------------------|-----------------------|-----------------------|-----------------------|-----------------------|----------------|
| ...tells the whole story *                       | 1                     | 2                     | 3                     | 4                     | 5                     |                |
| Strongly disagree                                | <input type="radio"/> | Strongly agree |
| <hr/>                                            |                       |                       |                       |                       |                       |                |
| ...is accurate *                                 | 1                     | 2                     | 3                     | 4                     | 5                     |                |
| Strongly disagree                                | <input type="radio"/> | Strongly agree |
| <hr/>                                            |                       |                       |                       |                       |                       |                |
| ...is unbiased *                                 | 1                     | 2                     | 3                     | 4                     | 5                     |                |
| Strongly disagree                                | <input type="radio"/> | Strongly agree |
| <hr/>                                            |                       |                       |                       |                       |                       |                |
| ...is fair *                                     | 1                     | 2                     | 3                     | 4                     | 5                     |                |
| Strongly disagree                                | <input type="radio"/> | Strongly agree |
| <hr/>                                            |                       |                       |                       |                       |                       |                |
| ... demonstrates concern about public interest * | 1                     | 2                     | 3                     | 4                     | 5                     |                |
| Strongly disagree                                | <input type="radio"/> | Strongly agree |
| <hr/>                                            |                       |                       |                       |                       |                       |                |
| ...is sensationalized *                          | 1                     | 2                     | 3                     | 4                     | 5                     |                |
| Strongly disagree                                | <input type="radio"/> | Strongly agree |
| <hr/>                                            |                       |                       |                       |                       |                       |                |
| ...is immoral *                                  | 1                     | 2                     | 3                     | 4                     | 5                     |                |
| Strongly disagree                                | <input type="radio"/> | Strongly agree |
| <hr/>                                            |                       |                       |                       |                       |                       |                |

## Image/Post

Please have a detailed look at the following image/post and tick 'I am done' when you finish:

**\***

☐ I am done

## Attention test

What was the color of the spikes in the last picture? \*

- ☐ Green
- ☐ Yellow
- ☐ Blue
- ☐ Black

# Feelings

Rate how positive or negative this post made you feel, ranging from '**sad**' to '**happy**':

**\***

1 2 3 4 5 6 7 8 9

Sad Happy

Rate how energetic this post made you feel, ranging from 'sleepy/apathetic' to 'excited/energetic': \*

**Sleepy/Apathetic**

1 2 3 4 5 6 7 8 9 **Excited**

Rate how in control of the situation this post made you feel, ranging from 'no control' to 'completely in control': \*

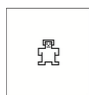

1

2

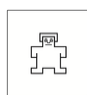

3

4

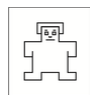

5

6

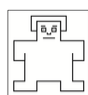

7

8

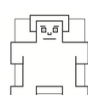

9

**No  
control**

☐☐☐☐☐☐☐☐☐

**Completely  
in control**

## Risk Assessment

After seeing this news post, how much anxiety do you feel in regards to the COVID-19 pandemic?\*

1

2

3

4

5

**No anxiety  
at all**

☐☐☐☐☐

**Very high  
anxiety**

After seeing the news post, how big of a risk do you think the COVID-19 pandemic poses to you or your family?\*

1

2

3

4

5

**No risk at  
all**

☐☐☐☐☐

**Very high  
risk**

Where 'dread' means to be in terror of, or fear intensely, how much do you dread the COVID-19 pandemic after seeing this news post?

\*

1

2

3

4

5

**No dread  
at all**

☐☐☐☐☐

**Very high  
dread**

After seeing the news post, what do you think is your likelihood of infection?\*

1

2

3

4

5

**Very  
unlikely**

☐☐☐☐☐

**Very likely**

After seeing the news post, how harmful do you think it would be if you got infected?\*

1

2

3

4

5

**Not  
harmful at  
all**

☐☐☐☐☐

**Very  
harmful**

## Engagement

**Are you likely to... (check where applicable)?\***

- ☐ Share the post
- ☐ Read the post
- ☐ Comment on the post
- ☐ Ignore the post

- ☐ Share the post
- ☐ Read the post
- ☐ Comment on the post
- ☐ Ignore the post

... can be trusted \*

[illegible]

|                          | 1                                                                                   | 2                                                                                   | 3                                                                                   | 4                                                                                   | 5                                                                                   |                       |
|--------------------------|-------------------------------------------------------------------------------------|-------------------------------------------------------------------------------------|-------------------------------------------------------------------------------------|-------------------------------------------------------------------------------------|-------------------------------------------------------------------------------------|-----------------------|
| <b>Strongly disagree</b> |  |  |  |  |  | <b>Strongly agree</b> |

|                          | 1                                                                                   | 2                                                                                   | 3                                                                                   | 4                                                                                   | 5                                                                                   |                       |
|--------------------------|-------------------------------------------------------------------------------------|-------------------------------------------------------------------------------------|-------------------------------------------------------------------------------------|-------------------------------------------------------------------------------------|-------------------------------------------------------------------------------------|-----------------------|
| <b>Strongly disagree</b> |  |  |  |  |  | <b>Strongly agree</b> |

|                          |   |   |   |   |   |                       |
|--------------------------|---|---|---|---|---|-----------------------|
|                          | 1 | 2 | 3 | 4 | 5 |                       |
| <b>Strongly disagree</b> |   |   |   |   |   | <b>Strongly agree</b> |

|                          | 1                                                                                   | 2                                                                                   | 3                                                                                   | 4                                                                                   | 5                                                                                   |                       |
|--------------------------|-------------------------------------------------------------------------------------|-------------------------------------------------------------------------------------|-------------------------------------------------------------------------------------|-------------------------------------------------------------------------------------|-------------------------------------------------------------------------------------|-----------------------|
| <b>Strongly disagree</b> |  |  |  |  |  | <b>Strongly agree</b> |

...is unbiased \*

1

2

3

4

5

Strongly disagree

☐

☐

☐

☐

☐

Strongly agree

...is fair \*

1

2

3

4

5

Strongly disagree

☐

☐

☐

☐

☐

Strongly agree

... demonstrates concern about public interest \*

1

2

3

4

5

Strongly disagree

☐

☐

☐

☐

☐

Strongly agree

...is sensationalized \*

1

2

3

4

5

Strongly disagree

☐

☐

☐

☐

☐

Strongly agree

...is immoral \*

1

2

3

4

5

Strongly disagree

☐

☐

☐

☐

☐

Strongly agree

Image/Post

Please have a detailed look at the following image/post and tick 'I am done' when you finish:

\*

☐ I am done

Attention test

- ☐ 10 seconds
- ☐ 20 seconds
- ☐ 40 seconds
- ☐ 60 seconds

\*

|                          | 1                     | 2                     | 3                     | 4                     | 5                     |                          |
|--------------------------|-----------------------|-----------------------|-----------------------|-----------------------|-----------------------|--------------------------|
| <b>No anxiety at all</b> | <input type="radio"/> | <b>Very high anxiety</b> |

After seeing the news post, how big of a risk do you think the COVID-19 pandemic poses to you or your family?\*

|                       |                       |                       |                       |                       |                       |                       |
|-----------------------|-----------------------|-----------------------|-----------------------|-----------------------|-----------------------|-----------------------|
|                       | 1                     | 2                     | 3                     | 4                     | 5                     |                       |
| <b>No risk at all</b> | <input type="radio"/> | <b>Very high risk</b> |

---

Where ‘dread’ means to be in terror of, or fear intensely, how much do you dread the COVID-19 pandemic after seeing this news post?

\*

|                        |                       |                       |                       |                       |                       |                        |
|------------------------|-----------------------|-----------------------|-----------------------|-----------------------|-----------------------|------------------------|
|                        | 1                     | 2                     | 3                     | 4                     | 5                     |                        |
| <b>No dread at all</b> | <input type="radio"/> | <b>Very high dread</b> |

---

After seeing the news post, what do you think is your likelihood of infection?\*

|                      |                       |                       |                       |                       |                       |                    |
|----------------------|-----------------------|-----------------------|-----------------------|-----------------------|-----------------------|--------------------|
|                      | 1                     | 2                     | 3                     | 4                     | 5                     |                    |
| <b>Very unlikely</b> | <input type="radio"/> | <b>Very likely</b> |

---

After seeing the news post, how harmful do you think it would be if you got infected?\*

|                           |                       |                       |                       |                       |                       |                     |
|---------------------------|-----------------------|-----------------------|-----------------------|-----------------------|-----------------------|---------------------|
|                           | 1                     | 2                     | 3                     | 4                     | 5                     |                     |
| <b>Not harmful at all</b> | <input type="radio"/> | <b>Very harmful</b> |

---

## Engagement

Are you likely to... (check where applicable)?\*

- ☐ Share the post
  - ☐ Read the post
  - ☐ Comment on the post
  - ☐ Ignore the post
- 

## Credibility



|                                   |                       |                       |                       |                       |                       |                |
|-----------------------------------|-----------------------|-----------------------|-----------------------|-----------------------|-----------------------|----------------|
| ... can be trusted *              | 1                     | 2                     | 3                     | 4                     | 5                     |                |
| Strongly disagree                 | <input type="radio"/> | Strongly agree |
| <hr/>                             |                       |                       |                       |                       |                       |                |
| ...separates facts from opinion * | 1                     | 2                     | 3                     | 4                     | 5                     |                |
| Strongly disagree                 | <input type="radio"/> | Strongly agree |
| <hr/>                             |                       |                       |                       |                       |                       |                |
| ...is factual *                   | 1                     | 2                     | 3                     | 4                     | 5                     |                |
| Strongly disagree                 | <input type="radio"/> | Strongly agree |
| <hr/>                             |                       |                       |                       |                       |                       |                |
| ...tells the whole story *        | 1                     | 2                     | 3                     | 4                     | 5                     |                |
| Strongly disagree                 | <input type="radio"/> | Strongly agree |
| <hr/>                             |                       |                       |                       |                       |                       |                |
| ...is accurate *                  | 1                     | 2                     | 3                     | 4                     | 5                     |                |
| Strongly disagree                 | <input type="radio"/> | Strongly agree |
| <hr/>                             |                       |                       |                       |                       |                       |                |
| ...is unbiased *                  | 1                     | 2                     | 3                     | 4                     | 5                     |                |
| Strongly disagree                 | <input type="radio"/> | Strongly agree |
| <hr/>                             |                       |                       |                       |                       |                       |                |
| ...is fair *                      | 1                     | 2                     | 3                     | 4                     | 5                     |                |
| Strongly disagree                 | <input type="radio"/> | Strongly agree |
| <hr/>                             |                       |                       |                       |                       |                       |                |

... demonstrates concern about public interest \*

|                          |                       |                       |                       |                       |                       |                       |
|--------------------------|-----------------------|-----------------------|-----------------------|-----------------------|-----------------------|-----------------------|
|                          | 1                     | 2                     | 3                     | 4                     | 5                     |                       |
| <b>Strongly disagree</b> | <input type="radio"/> | <b>Strongly agree</b> |

---

...is sensationalized \*

|                          |                       |                       |                       |                       |                       |                       |
|--------------------------|-----------------------|-----------------------|-----------------------|-----------------------|-----------------------|-----------------------|
|                          | 1                     | 2                     | 3                     | 4                     | 5                     |                       |
| <b>Strongly disagree</b> | <input type="radio"/> | <b>Strongly agree</b> |

---

...is immoral \*

|                          |                       |                       |                       |                       |                       |                       |
|--------------------------|-----------------------|-----------------------|-----------------------|-----------------------|-----------------------|-----------------------|
|                          | 1                     | 2                     | 3                     | 4                     | 5                     |                       |
| <b>Strongly disagree</b> | <input type="radio"/> | <b>Strongly agree</b> |

---

## Image/Post

Please have a detailed look at the following image/post and tick 'I am done' when you finish:

\*

☐ I am done

---

## Attention test

For which part of the United Kingdom the recommendations/guidance were given in the last picture? \*

- ☐ England
  - ☐ Wales
  - ☐ Scotland
- 

## Feelings

Rate how positive or negative this post made you feel, ranging from 'sad' to 'happy':

\*

|     |                                                                                   |                       |                       |                                                                                   |                       |                       |                                                                                   |                       |                       |                                                                                     |  |  |                                                                                     |       |
|-----|-----------------------------------------------------------------------------------|-----------------------|-----------------------|-----------------------------------------------------------------------------------|-----------------------|-----------------------|-----------------------------------------------------------------------------------|-----------------------|-----------------------|-------------------------------------------------------------------------------------|--|--|-------------------------------------------------------------------------------------|-------|
|     |  |                       |                       |  |                       |                       |  |                       |                       |  |  |  |  |       |
|     | 1                                                                                 | 2                     | 3                     | 4                                                                                 | 5                     | 6                     | 7                                                                                 | 8                     | 9                     |                                                                                     |  |  |                                                                                     |       |
| Sad | <input type="radio"/>                                                             | <input type="radio"/> | <input type="radio"/> | <input type="radio"/>                                                             | <input type="radio"/> | <input type="radio"/> | <input type="radio"/>                                                             | <input type="radio"/> | <input type="radio"/> |                                                                                     |  |  | <input type="radio"/>                                                               | Happy |

Rate how energetic this post made you feel, ranging from 'sleepy/apathetic' to 'excited/energetic': \*

|                  |                                                                                   |                       |                       |                                                                                   |                       |                       |                                                                                   |                       |                       |                                                                                     |  |  |                                                                                     |         |
|------------------|-----------------------------------------------------------------------------------|-----------------------|-----------------------|-----------------------------------------------------------------------------------|-----------------------|-----------------------|-----------------------------------------------------------------------------------|-----------------------|-----------------------|-------------------------------------------------------------------------------------|--|--|-------------------------------------------------------------------------------------|---------|
|                  |  |                       |                       |  |                       |                       |  |                       |                       |  |  |  |  |         |
|                  | 1                                                                                 | 2                     | 3                     | 4                                                                                 | 5                     | 6                     | 7                                                                                 | 8                     | 9                     |                                                                                     |  |  |                                                                                     |         |
| Sleepy/Apathetic | <input type="radio"/>                                                             | <input type="radio"/> | <input type="radio"/> | <input type="radio"/>                                                             | <input type="radio"/> | <input type="radio"/> | <input type="radio"/>                                                             | <input type="radio"/> | <input type="radio"/> |                                                                                     |  |  | <input type="radio"/>                                                               | Excited |

Rate how in control of the situation this post made you feel, ranging from 'no control' to 'completely in control': \*

|            |                                                                                   |                       |                       |                                                                                   |                       |                       |                                                                                   |                       |                       |                                                                                    |  |  |                                                                                     |                       |
|------------|-----------------------------------------------------------------------------------|-----------------------|-----------------------|-----------------------------------------------------------------------------------|-----------------------|-----------------------|-----------------------------------------------------------------------------------|-----------------------|-----------------------|------------------------------------------------------------------------------------|--|--|-------------------------------------------------------------------------------------|-----------------------|
|            |  |                       |                       |  |                       |                       |  |                       |                       |  |  |  |  |                       |
|            | 1                                                                                 | 2                     | 3                     | 4                                                                                 | 5                     | 6                     | 7                                                                                 | 8                     | 9                     |                                                                                    |  |  |                                                                                     |                       |
| No control | <input type="radio"/>                                                             | <input type="radio"/> | <input type="radio"/> | <input type="radio"/>                                                             | <input type="radio"/> | <input type="radio"/> | <input type="radio"/>                                                             | <input type="radio"/> | <input type="radio"/> |                                                                                    |  |  | <input type="radio"/>                                                               | Completely in control |

## Risk Assessment

After seeing this news post, how much anxiety do you feel in regards to the COVID-19 pandemic?\*

|                   |                       |                       |                       |                       |                       |                   |
|-------------------|-----------------------|-----------------------|-----------------------|-----------------------|-----------------------|-------------------|
|                   | 1                     | 2                     | 3                     | 4                     | 5                     |                   |
| No anxiety at all | <input type="radio"/> | Very high anxiety |

After seeing the news post, how big of a risk do you think the COVID-19 pandemic poses to you or your family?\*

|                |                       |                       |                       |                       |                       |                |
|----------------|-----------------------|-----------------------|-----------------------|-----------------------|-----------------------|----------------|
|                | 1                     | 2                     | 3                     | 4                     | 5                     |                |
| No risk at all | <input type="radio"/> | Very high risk |



|                                                  |                       |                       |                       |                       |                       |                |
|--------------------------------------------------|-----------------------|-----------------------|-----------------------|-----------------------|-----------------------|----------------|
| ...separates facts from opinion *                |                       |                       |                       |                       |                       |                |
|                                                  | 1                     | 2                     | 3                     | 4                     | 5                     |                |
| Strongly disagree                                | <input type="radio"/> | Strongly agree |
| ...is factual *                                  |                       |                       |                       |                       |                       |                |
|                                                  | 1                     | 2                     | 3                     | 4                     | 5                     |                |
| Strongly disagree                                | <input type="radio"/> | Strongly agree |
| ...tells the whole story *                       |                       |                       |                       |                       |                       |                |
|                                                  | 1                     | 2                     | 3                     | 4                     | 5                     |                |
| Strongly disagree                                | <input type="radio"/> | Strongly agree |
| ...is accurate *                                 |                       |                       |                       |                       |                       |                |
|                                                  | 1                     | 2                     | 3                     | 4                     | 5                     |                |
| Strongly disagree                                | <input type="radio"/> | Strongly agree |
| ...is unbiased *                                 |                       |                       |                       |                       |                       |                |
|                                                  | 1                     | 2                     | 3                     | 4                     | 5                     |                |
| Strongly disagree                                | <input type="radio"/> | Strongly agree |
| ...is fair *                                     |                       |                       |                       |                       |                       |                |
|                                                  | 1                     | 2                     | 3                     | 4                     | 5                     |                |
| Strongly disagree                                | <input type="radio"/> | Strongly agree |
| ... demonstrates concern about public interest * |                       |                       |                       |                       |                       |                |
|                                                  | 1                     | 2                     | 3                     | 4                     | 5                     |                |
| Strongly disagree                                | <input type="radio"/> | Strongly agree |

|                          |                       |                       |                       |                       |                       |                       |
|--------------------------|-----------------------|-----------------------|-----------------------|-----------------------|-----------------------|-----------------------|
|                          | 1                     | 2                     | 3                     | 4                     | 5                     |                       |
| <b>Strongly disagree</b> | <input type="radio"/> | <b>Strongly agree</b> |

[illegible]

\*

**\***

Rate how energetic this post made you feel, ranging from 'sleepy/apathetic' to 'excited/energetic' : \*







1      2      3      4      5      6      7      8      9

**Sleepy/Apathetic**                                                **Excited**

Rate how in control of the situation this post made you feel, ranging from 'no control' to 'completely in control': \*

Figure 1: A 9-point Likert scale for the degree of control over the environment. The scale is represented by a horizontal row of nine circles, with the first circle on the left labeled "No control" and the last circle on the right labeled "Completely in control". Above the circles, a series of nine icons illustrates the progression of control. The icons are: 1. A small robot in a square box. 2. A small robot in a square box. 3. A small robot in a square box. 4. A small robot in a square box. 5. A small robot in a square box. 6. A small robot in a square box. 7. A small robot in a square box. 8. A small robot in a square box. 9. A small robot in a square box.

## Risk Assessment

After seeing this news post, how much anxiety do you feel in regards to the COVID-19 pandemic?\*

|                          | 1                     | 2                     | 3                     | 4                     | 5                     |                          |
|--------------------------|-----------------------|-----------------------|-----------------------|-----------------------|-----------------------|--------------------------|
| <b>No anxiety at all</b> | <input type="radio"/> | <b>Very high anxiety</b> |

After seeing the news post, how big of a risk do you think the COVID-19 pandemic poses to you or your family?\*

|                | 1                                                                                   | 2                                                                                   | 3                                                                                   | 4                                                                                   | 5                                                                                   |                |
|----------------|-------------------------------------------------------------------------------------|-------------------------------------------------------------------------------------|-------------------------------------------------------------------------------------|-------------------------------------------------------------------------------------|-------------------------------------------------------------------------------------|----------------|
| No risk at all |  |  |  |  |  | Very high risk |

Where 'dread' means to be in terror of, or fear intensely, how much do you dread the COVID-19 pandemic after seeing this news post?

\*

|                 |                       |                       |                       |                       |                       |                 |
|-----------------|-----------------------|-----------------------|-----------------------|-----------------------|-----------------------|-----------------|
|                 | 1                     | 2                     | 3                     | 4                     | 5                     |                 |
| No dread at all | <input type="radio"/> | Very high dread |

After seeing the news post, what do you think is your likelihood of infection?\*

|                      | 1                                                                                   | 2                                                                                   | 3                                                                                   | 4                                                                                   | 5                                                                                   |                    |
|----------------------|-------------------------------------------------------------------------------------|-------------------------------------------------------------------------------------|-------------------------------------------------------------------------------------|-------------------------------------------------------------------------------------|-------------------------------------------------------------------------------------|--------------------|
| <b>Very unlikely</b> |  |  |  |  |  | <b>Very likely</b> |

Not harmful at all 1 2 3 4 5 Very harmful

- ☐ Share the post
- ☐ Read the post
- ☐ Comment on the post
- ☐ Ignore the post

[illegible]

|                          |   |   |   |   |   |                       |
|--------------------------|---|---|---|---|---|-----------------------|
|                          | 1 | 2 | 3 | 4 | 5 |                       |
| <b>Strongly disagree</b> |   |   |   |   |   | <b>Strongly agree</b> |

[illegible]



...tells the whole story \*

1

2

3

4

5

Strongly disagree

☐

☐

☐

☐

☐

Strongly agree

...is accurate \*

1

2

3

4

5

Strongly disagree

☐

☐

☐

☐

☐

Strongly agree

...is unbiased \*

1

2

3

4

5

Strongly disagree

☐

☐

☐

☐

☐

Strongly agree

...is fair \*

1

2

3

4

5

Strongly disagree

☐

☐

☐

☐

☐

Strongly agree

... demonstrates concern about public interest \*

1

2

3

4

5

Strongly disagree

☐

☐

☐

☐

☐

Strongly agree

...is sensationalized \*

1

2

3

4

5

Strongly disagree

☐

☐

☐

☐

☐

Strongly agree

...is immoral \*

1

2

3

4

5

Strongly disagree

☐

☐

☐

☐

☐

Strongly agree

## Image/Post

Please have a detailed look at the following image/post and tick 'I am done' when you finish:

\*

☐ I am done

## Attention test

Which months were represented by the bar chart in the last picture? \*

- ☐ February and April
- ☐ October and December
- ☐ January and September

## Feelings

Rate how positive or negative this post made you feel, ranging from 'sad' to 'happy':

\*

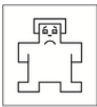

1

2

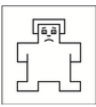

3

4

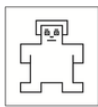

5

6

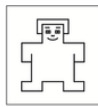

7

8

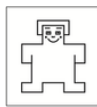

9

Sad

☐☐☐☐☐☐☐☐☐

Happy

Rate how energetic this post made you feel, ranging from 'sleepy/apathetic' to 'excited/energetic' : \*

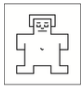

1

2

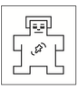

3

4

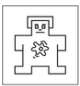

5

6

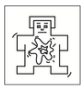

7

8

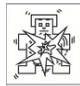

9

Sleepy/Apathetic

☐☐☐☐☐☐☐☐☐

Excited

Rate how in control of the situation this post made you feel, ranging from 'no control' to 'completely in control': \*

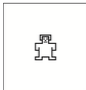

1

2

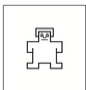

3

4

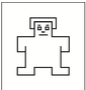

5

6

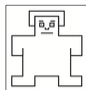

7

8

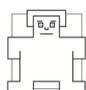

9

No  
control

☐☐☐☐☐☐☐☐☐

Completely  
in control

## Risk Assessment

After seeing this news post, how much anxiety do you feel in regards to the COVID-19 pandemic?\*

|                              |                       |                       |                       |                       |                       |                              |
|------------------------------|-----------------------|-----------------------|-----------------------|-----------------------|-----------------------|------------------------------|
|                              | 1                     | 2                     | 3                     | 4                     | 5                     |                              |
| <b>No anxiety<br/>at all</b> | <input type="radio"/> | <b>Very high<br/>anxiety</b> |

---

After seeing the news post, how big of a risk do you think the COVID-19 pandemic poses to you or your family?\*

|                           |                       |                       |                       |                       |                       |                           |
|---------------------------|-----------------------|-----------------------|-----------------------|-----------------------|-----------------------|---------------------------|
|                           | 1                     | 2                     | 3                     | 4                     | 5                     |                           |
| <b>No risk at<br/>all</b> | <input type="radio"/> | <b>Very high<br/>risk</b> |

---

Where 'dread' means to be in terror of, or fear intensely, how much do you dread the COVID-19 pandemic after seeing this news post?

\*

|                            |                       |                       |                       |                       |                       |                            |
|----------------------------|-----------------------|-----------------------|-----------------------|-----------------------|-----------------------|----------------------------|
|                            | 1                     | 2                     | 3                     | 4                     | 5                     |                            |
| <b>No dread<br/>at all</b> | <input type="radio"/> | <b>Very high<br/>dread</b> |

---

After seeing the news post, what do you think is your likelihood of infection?\*

|                          |                       |                       |                       |                       |                       |                    |
|--------------------------|-----------------------|-----------------------|-----------------------|-----------------------|-----------------------|--------------------|
|                          | 1                     | 2                     | 3                     | 4                     | 5                     |                    |
| <b>Very<br/>unlikely</b> | <input type="radio"/> | <b>Very likely</b> |

---

After seeing the news post, how harmful do you think it would be if you got infected?\*

|                                   |                       |                       |                       |                       |                       |                         |
|-----------------------------------|-----------------------|-----------------------|-----------------------|-----------------------|-----------------------|-------------------------|
|                                   | 1                     | 2                     | 3                     | 4                     | 5                     |                         |
| <b>Not<br/>harmful at<br/>all</b> | <input type="radio"/> | <b>Very<br/>harmful</b> |

---

## Engagement

- ☐ Share the post
- ☐ Read the post
- ☐ Comment on the post
- ☐ Ignore the post

... can be trusted \*

[illegible][illegible][illegible][illegible][illegible]

...is unbiased \*

1

2

3

4

5

Strongly disagree

☐

☐

☐

☐

☐

Strongly agree

...is fair \*

1

2

3

4

5

Strongly disagree

☐

☐

☐

☐

☐

Strongly agree

... demonstrates concern about public interest \*

1

2

3

4

5

Strongly disagree

☐

☐

☐

☐

☐

Strongly agree

...is sensationalized \*

1

2

3

4

5

Strongly disagree

☐

☐

☐

☐

☐

Strongly agree

...is immoral \*

1

2

3

4

5

Strongly disagree

☐

☐

☐

☐

☐

Strongly agree

Image/Post

Please have a detailed look at the following image/post and tick 'I am done' when you finish:

\*

☐ I am done

Attention test

Which country was referred to by the chart in the last picture? \*

- ☐ UK
- ☐ US
- ☐ Australia

## Feelings

Rate how positive or negative this post made you feel, ranging from '**sad**' to '**happy**':

\*

|            |                                                                                   |                       |                       |                                                                                   |                       |                       |                                                                                   |                       |                       |                                                                                     |  |  |                                                                                     |              |
|------------|-----------------------------------------------------------------------------------|-----------------------|-----------------------|-----------------------------------------------------------------------------------|-----------------------|-----------------------|-----------------------------------------------------------------------------------|-----------------------|-----------------------|-------------------------------------------------------------------------------------|--|--|-------------------------------------------------------------------------------------|--------------|
|            |  |                       |                       |  |                       |                       |  |                       |                       |  |  |  |  |              |
|            | 1                                                                                 | 2                     | 3                     | 4                                                                                 | 5                     | 6                     | 7                                                                                 | 8                     | 9                     |                                                                                     |  |  |                                                                                     |              |
| <b>Sad</b> | <input type="radio"/>                                                             | <input type="radio"/> | <input type="radio"/> | <input type="radio"/>                                                             | <input type="radio"/> | <input type="radio"/> | <input type="radio"/>                                                             | <input type="radio"/> | <input type="radio"/> |                                                                                     |  |  |                                                                                     | <b>Happy</b> |

Rate how energetic this post made you feel, ranging from '**sleepy/apathetic**' to '**excited/energetic**' : \*

|                         |                                                                                    |                       |                       |                                                                                    |                       |                       |                                                                                    |                       |                       |                                                                                      |  |  |                                                                                      |                |
|-------------------------|------------------------------------------------------------------------------------|-----------------------|-----------------------|------------------------------------------------------------------------------------|-----------------------|-----------------------|------------------------------------------------------------------------------------|-----------------------|-----------------------|--------------------------------------------------------------------------------------|--|--|--------------------------------------------------------------------------------------|----------------|
|                         |  |                       |                       |  |                       |                       |  |                       |                       |  |  |  |  |                |
|                         | 1                                                                                  | 2                     | 3                     | 4                                                                                  | 5                     | 6                     | 7                                                                                  | 8                     | 9                     |                                                                                      |  |  |                                                                                      |                |
| <b>Sleepy/Apathetic</b> | <input type="radio"/>                                                              | <input type="radio"/> | <input type="radio"/> | <input type="radio"/>                                                              | <input type="radio"/> | <input type="radio"/> | <input type="radio"/>                                                              | <input type="radio"/> | <input type="radio"/> |                                                                                      |  |  |                                                                                      | <b>Excited</b> |

Rate how in control of the situation this post made you feel, ranging from '**no control**' to '**completely in control**': \*

|                   |                                                                                     |                       |                       |                                                                                     |                       |                       |                                                                                     |                       |                       |                                                                                      |  |  |                                                                                       |                              |
|-------------------|-------------------------------------------------------------------------------------|-----------------------|-----------------------|-------------------------------------------------------------------------------------|-----------------------|-----------------------|-------------------------------------------------------------------------------------|-----------------------|-----------------------|--------------------------------------------------------------------------------------|--|--|---------------------------------------------------------------------------------------|------------------------------|
|                   |  |                       |                       |  |                       |                       |  |                       |                       |  |  |  |  |                              |
|                   | 1                                                                                   | 2                     | 3                     | 4                                                                                   | 5                     | 6                     | 7                                                                                   | 8                     | 9                     |                                                                                      |  |  |                                                                                       |                              |
| <b>No control</b> | <input type="radio"/>                                                               | <input type="radio"/> | <input type="radio"/> | <input type="radio"/>                                                               | <input type="radio"/> | <input type="radio"/> | <input type="radio"/>                                                               | <input type="radio"/> | <input type="radio"/> |                                                                                      |  |  |                                                                                       | <b>Completely in control</b> |

## Risk Assessment

After seeing this news post, how much anxiety do you feel in regards to the COVID-19 pandemic?\*

|                          |                       |                       |                       |                       |                       |                          |
|--------------------------|-----------------------|-----------------------|-----------------------|-----------------------|-----------------------|--------------------------|
|                          | 1                     | 2                     | 3                     | 4                     | 5                     |                          |
| <b>No anxiety at all</b> | <input type="radio"/> | <b>Very high anxiety</b> |

After seeing the news post, how big of a risk do you think the COVID-19 pandemic poses to you or your family?\*

|                       |                       |                       |                       |                       |                       |                       |
|-----------------------|-----------------------|-----------------------|-----------------------|-----------------------|-----------------------|-----------------------|
|                       | 1                     | 2                     | 3                     | 4                     | 5                     |                       |
| <b>No risk at all</b> | <input type="radio"/> | <b>Very high risk</b> |

---

Where ‘dread’ means to be in terror of, or fear intensely, how much do you dread the COVID-19 pandemic after seeing this news post?

\*

|                        |                       |                       |                       |                       |                       |                        |
|------------------------|-----------------------|-----------------------|-----------------------|-----------------------|-----------------------|------------------------|
|                        | 1                     | 2                     | 3                     | 4                     | 5                     |                        |
| <b>No dread at all</b> | <input type="radio"/> | <b>Very high dread</b> |

---

After seeing the news post, what do you think is your likelihood of infection?\*

|                      |                       |                       |                       |                       |                       |                    |
|----------------------|-----------------------|-----------------------|-----------------------|-----------------------|-----------------------|--------------------|
|                      | 1                     | 2                     | 3                     | 4                     | 5                     |                    |
| <b>Very unlikely</b> | <input type="radio"/> | <b>Very likely</b> |

---

After seeing the news post, how harmful do you think it would be if you got infected?\*

|                           |                       |                       |                       |                       |                       |                     |
|---------------------------|-----------------------|-----------------------|-----------------------|-----------------------|-----------------------|---------------------|
|                           | 1                     | 2                     | 3                     | 4                     | 5                     |                     |
| <b>Not harmful at all</b> | <input type="radio"/> | <b>Very harmful</b> |

---

## Engagement

Are you likely to... (check where applicable)?\*

- ☐ Share the post
  - ☐ Read the post
  - ☐ Comment on the post
  - ☐ Ignore the post
- 

## Credibility

|                                   |                       |                       |                       |                       |                       |                |
|-----------------------------------|-----------------------|-----------------------|-----------------------|-----------------------|-----------------------|----------------|
| ... can be trusted *              | 1                     | 2                     | 3                     | 4                     | 5                     |                |
| Strongly disagree                 | <input type="radio"/> | Strongly agree |
| <hr/>                             |                       |                       |                       |                       |                       |                |
| ...separates facts from opinion * | 1                     | 2                     | 3                     | 4                     | 5                     |                |
| Strongly disagree                 | <input type="radio"/> | Strongly agree |
| <hr/>                             |                       |                       |                       |                       |                       |                |
| ...is factual *                   | 1                     | 2                     | 3                     | 4                     | 5                     |                |
| Strongly disagree                 | <input type="radio"/> | Strongly agree |
| <hr/>                             |                       |                       |                       |                       |                       |                |
| ...tells the whole story *        | 1                     | 2                     | 3                     | 4                     | 5                     |                |
| Strongly disagree                 | <input type="radio"/> | Strongly agree |
| <hr/>                             |                       |                       |                       |                       |                       |                |
| ...is accurate *                  | 1                     | 2                     | 3                     | 4                     | 5                     |                |
| Strongly disagree                 | <input type="radio"/> | Strongly agree |
| <hr/>                             |                       |                       |                       |                       |                       |                |
| ...is unbiased *                  | 1                     | 2                     | 3                     | 4                     | 5                     |                |
| Strongly disagree                 | <input type="radio"/> | Strongly agree |
| <hr/>                             |                       |                       |                       |                       |                       |                |
| ...is fair *                      | 1                     | 2                     | 3                     | 4                     | 5                     |                |
| Strongly disagree                 | <input type="radio"/> | Strongly agree |
| <hr/>                             |                       |                       |                       |                       |                       |                |



... demonstrates concern about public interest \*

|                          |                       |                       |                       |                       |                       |                       |
|--------------------------|-----------------------|-----------------------|-----------------------|-----------------------|-----------------------|-----------------------|
|                          | 1                     | 2                     | 3                     | 4                     | 5                     |                       |
| <b>Strongly disagree</b> | <input type="radio"/> | <b>Strongly agree</b> |

---

...is sensationalized \*

|                          |                       |                       |                       |                       |                       |                       |
|--------------------------|-----------------------|-----------------------|-----------------------|-----------------------|-----------------------|-----------------------|
|                          | 1                     | 2                     | 3                     | 4                     | 5                     |                       |
| <b>Strongly disagree</b> | <input type="radio"/> | <b>Strongly agree</b> |

---

...is immoral \*

|                          |                       |                       |                       |                       |                       |                       |
|--------------------------|-----------------------|-----------------------|-----------------------|-----------------------|-----------------------|-----------------------|
|                          | 1                     | 2                     | 3                     | 4                     | 5                     |                       |
| <b>Strongly disagree</b> | <input type="radio"/> | <b>Strongly agree</b> |

---

## Image/Post

Please have a detailed look at the following image/post and tick 'I am done' when you finish:

\*

☐ I am done

---

## Attention test

What was represented on the left and right sides of the chart in the last picture? \*

- ☐ Boys and Girls
  - ☐ Males and Females
  - ☐ Educated and Uneducated
- 

## Feelings

Rate how positive or negative this post made you feel, ranging from 'sad' to 'happy':

\*

|     |                                                                                   |                       |                       |                                                                                   |                       |                       |                                                                                   |                       |                       |                                                                                     |  |  |                                                                                     |       |
|-----|-----------------------------------------------------------------------------------|-----------------------|-----------------------|-----------------------------------------------------------------------------------|-----------------------|-----------------------|-----------------------------------------------------------------------------------|-----------------------|-----------------------|-------------------------------------------------------------------------------------|--|--|-------------------------------------------------------------------------------------|-------|
|     |  |                       |                       |  |                       |                       |  |                       |                       |  |  |  |  |       |
|     | 1                                                                                 | 2                     | 3                     | 4                                                                                 | 5                     | 6                     | 7                                                                                 | 8                     | 9                     |                                                                                     |  |  |                                                                                     |       |
| Sad | <input type="radio"/>                                                             | <input type="radio"/> | <input type="radio"/> | <input type="radio"/>                                                             | <input type="radio"/> | <input type="radio"/> | <input type="radio"/>                                                             | <input type="radio"/> | <input type="radio"/> |                                                                                     |  |  | <input type="radio"/>                                                               | Happy |

Rate how energetic this post made you feel, ranging from 'sleepy/apathetic' to 'excited/energetic': \*

|                  |                                                                                   |                       |                       |                                                                                   |                       |                       |                                                                                   |                       |                       |                                                                                     |  |  |                                                                                     |         |
|------------------|-----------------------------------------------------------------------------------|-----------------------|-----------------------|-----------------------------------------------------------------------------------|-----------------------|-----------------------|-----------------------------------------------------------------------------------|-----------------------|-----------------------|-------------------------------------------------------------------------------------|--|--|-------------------------------------------------------------------------------------|---------|
|                  |  |                       |                       |  |                       |                       |  |                       |                       |  |  |  |  |         |
|                  | 1                                                                                 | 2                     | 3                     | 4                                                                                 | 5                     | 6                     | 7                                                                                 | 8                     | 9                     |                                                                                     |  |  |                                                                                     |         |
| Sleepy/Apathetic | <input type="radio"/>                                                             | <input type="radio"/> | <input type="radio"/> | <input type="radio"/>                                                             | <input type="radio"/> | <input type="radio"/> | <input type="radio"/>                                                             | <input type="radio"/> | <input type="radio"/> |                                                                                     |  |  | <input type="radio"/>                                                               | Excited |

Rate how in control of the situation this post made you feel, ranging from 'no control' to 'completely in control': \*

|            |                                                                                   |                       |                       |                                                                                   |                       |                       |                                                                                   |                       |                       |                                                                                    |  |  |                                                                                     |                       |
|------------|-----------------------------------------------------------------------------------|-----------------------|-----------------------|-----------------------------------------------------------------------------------|-----------------------|-----------------------|-----------------------------------------------------------------------------------|-----------------------|-----------------------|------------------------------------------------------------------------------------|--|--|-------------------------------------------------------------------------------------|-----------------------|
|            |  |                       |                       |  |                       |                       |  |                       |                       |  |  |  |  |                       |
|            | 1                                                                                 | 2                     | 3                     | 4                                                                                 | 5                     | 6                     | 7                                                                                 | 8                     | 9                     |                                                                                    |  |  |                                                                                     |                       |
| No control | <input type="radio"/>                                                             | <input type="radio"/> | <input type="radio"/> | <input type="radio"/>                                                             | <input type="radio"/> | <input type="radio"/> | <input type="radio"/>                                                             | <input type="radio"/> | <input type="radio"/> |                                                                                    |  |  | <input type="radio"/>                                                               | Completely in control |

## Risk Assessment

After seeing this news post, how much anxiety do you feel in regards to the COVID-19 pandemic?\*

|                   |                       |                       |                       |                       |                       |                   |
|-------------------|-----------------------|-----------------------|-----------------------|-----------------------|-----------------------|-------------------|
|                   | 1                     | 2                     | 3                     | 4                     | 5                     |                   |
| No anxiety at all | <input type="radio"/> | Very high anxiety |

After seeing the news post, how big of a risk do you think the COVID-19 pandemic poses to you or your family?\*

|                |                       |                       |                       |                       |                       |                |
|----------------|-----------------------|-----------------------|-----------------------|-----------------------|-----------------------|----------------|
|                | 1                     | 2                     | 3                     | 4                     | 5                     |                |
| No risk at all | <input type="radio"/> | Very high risk |

**\***

After seeing the news post, what do you think is your likelihood of infection?\*

After seeing the news post, how harmful do you think it would be if you got infected?\*

## Credibility

|                                                  |                       |                       |                       |                       |                       |                |
|--------------------------------------------------|-----------------------|-----------------------|-----------------------|-----------------------|-----------------------|----------------|
| ...separates facts from opinion *                |                       |                       |                       |                       |                       |                |
|                                                  | 1                     | 2                     | 3                     | 4                     | 5                     |                |
| Strongly disagree                                | <input type="radio"/> | Strongly agree |
| ...is factual *                                  |                       |                       |                       |                       |                       |                |
|                                                  | 1                     | 2                     | 3                     | 4                     | 5                     |                |
| Strongly disagree                                | <input type="radio"/> | Strongly agree |
| ...tells the whole story *                       |                       |                       |                       |                       |                       |                |
|                                                  | 1                     | 2                     | 3                     | 4                     | 5                     |                |
| Strongly disagree                                | <input type="radio"/> | Strongly agree |
| ...is accurate *                                 |                       |                       |                       |                       |                       |                |
|                                                  | 1                     | 2                     | 3                     | 4                     | 5                     |                |
| Strongly disagree                                | <input type="radio"/> | Strongly agree |
| ...is unbiased *                                 |                       |                       |                       |                       |                       |                |
|                                                  | 1                     | 2                     | 3                     | 4                     | 5                     |                |
| Strongly disagree                                | <input type="radio"/> | Strongly agree |
| ...is fair *                                     |                       |                       |                       |                       |                       |                |
|                                                  | 1                     | 2                     | 3                     | 4                     | 5                     |                |
| Strongly disagree                                | <input type="radio"/> | Strongly agree |
| ... demonstrates concern about public interest * |                       |                       |                       |                       |                       |                |
|                                                  | 1                     | 2                     | 3                     | 4                     | 5                     |                |
| Strongly disagree                                | <input type="radio"/> | Strongly agree |

...is sensationalized \*

|                          |                       |                       |                       |                       |                       |                       |
|--------------------------|-----------------------|-----------------------|-----------------------|-----------------------|-----------------------|-----------------------|
|                          | 1                     | 2                     | 3                     | 4                     | 5                     |                       |
| <b>Strongly disagree</b> | <input type="radio"/> | <b>Strongly agree</b> |

---

...is immoral \*

|                          |                       |                       |                       |                       |                       |                       |
|--------------------------|-----------------------|-----------------------|-----------------------|-----------------------|-----------------------|-----------------------|
|                          | 1                     | 2                     | 3                     | 4                     | 5                     |                       |
| <b>Strongly disagree</b> | <input type="radio"/> | <b>Strongly agree</b> |

---

## Demographic Information and Internet Usage Habits

Your Age: \*

Your Gender: \*

- ☐ Male
- ☐ Female

What is the highest degree or education level you have completed:\*

- ☐ High School
- ☐ Bachelor's degree
- ☐ Master's degree
- ☐ Ph.D or higher
- ☐ Prefer not to say
- ☐ None
-

Which of the following social media do you use? \*

☐ Facebook

☐ Instagram

☐ Twitter

☐ YouTube

☐ LinkedIn

☐ Other - Write In (Required)

\*

How many hours per day do you spend on social media? \*

What is your main source of news about the world? \*

☐ Television

☐ News websites

☐ Social media

☐ Newspaper

☐ Podcasts

☐ Radio

☐ Other - Write In (Required)

How active are you on social media through commenting, sharing, liking or posting content? \*

1

2

3

4

5

**Not active  
at all**

☐

☐

☐

☐

☐

**Extremely  
active**

Thank You!

Thank you for taking our survey. Your response is very important to us.

Here is your completion code: [question('value'), id='301']
