# Supplementary material for: Effect of visual imagery in COVID-19 social media posts on users’ perception
Source: PeerJ journal article supplement (doi:10.7717/peerj-cs.1153), 2022-11-15
Supplement: PS2_Survey+stimuli.zip [file PS2_Survey%2Bstimuli.zip]

Survey Map

This survey is collecting data from you concerning the personal risk associated with browsing mobile-size social media posts about Covid-19. All questions are in the form of multiple-choice.

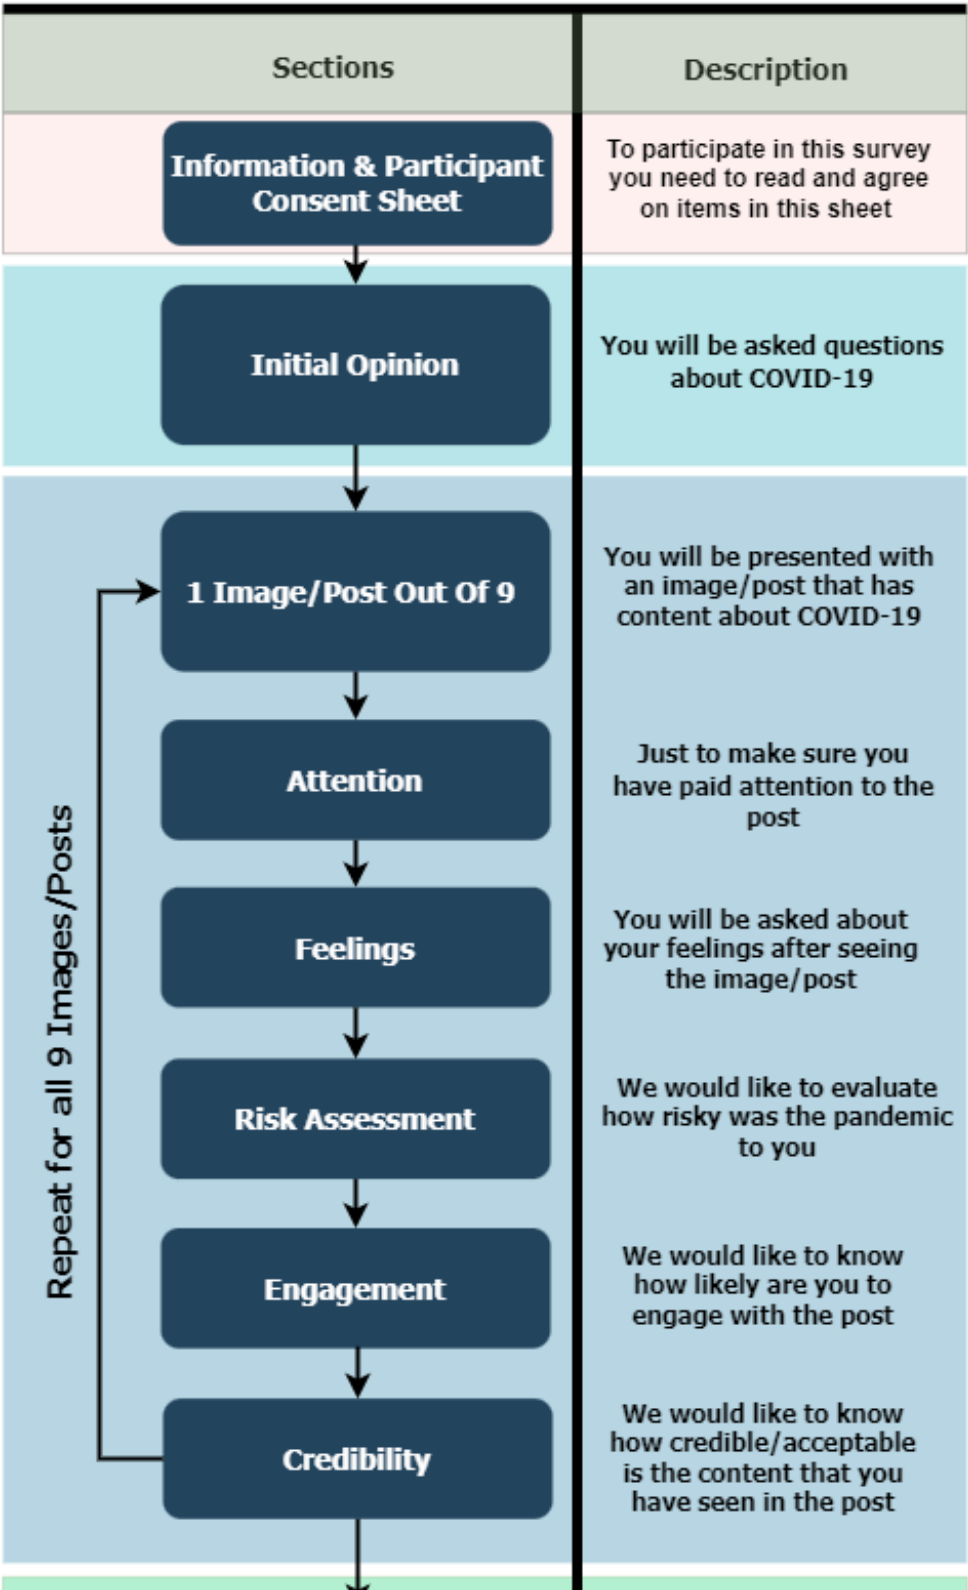







|                           |   |   |   |   |   |                     |
|---------------------------|---|---|---|---|---|---------------------|
|                           | 1 | 2 | 3 | 4 | 5 |                     |
| <b>Not harmful at all</b> |   |   |   |   |   | <b>Very harmful</b> |

- ☐ Share the post
- ☐ Read the post
- ☐ Comment on the post
- ☐ Ignore the post

[illegible][illegible]

|                          | 1                     | 2                     | 3                     | 4                                | 5                     |                       |
|--------------------------|-----------------------|-----------------------|-----------------------|----------------------------------|-----------------------|-----------------------|
| <b>Strongly disagree</b> | <input type="radio"/> | <input type="radio"/> | <input type="radio"/> | <input checked="" type="radio"/> | <input type="radio"/> | <b>Strongly agree</b> |

|                                                  |                       |                       |                       |                       |                       |                |
|--------------------------------------------------|-----------------------|-----------------------|-----------------------|-----------------------|-----------------------|----------------|
| ...tells the whole story *                       | 1                     | 2                     | 3                     | 4                     | 5                     |                |
| Strongly disagree                                | <input type="radio"/> | Strongly agree |
| <hr/>                                            |                       |                       |                       |                       |                       |                |
| ...is accurate *                                 | 1                     | 2                     | 3                     | 4                     | 5                     |                |
| Strongly disagree                                | <input type="radio"/> | Strongly agree |
| <hr/>                                            |                       |                       |                       |                       |                       |                |
| ...is unbiased *                                 | 1                     | 2                     | 3                     | 4                     | 5                     |                |
| Strongly disagree                                | <input type="radio"/> | Strongly agree |
| <hr/>                                            |                       |                       |                       |                       |                       |                |
| ...is fair *                                     | 1                     | 2                     | 3                     | 4                     | 5                     |                |
| Strongly disagree                                | <input type="radio"/> | Strongly agree |
| <hr/>                                            |                       |                       |                       |                       |                       |                |
| ... demonstrates concern about public interest * | 1                     | 2                     | 3                     | 4                     | 5                     |                |
| Strongly disagree                                | <input type="radio"/> | Strongly agree |
| <hr/>                                            |                       |                       |                       |                       |                       |                |
| ...is sensationalized *                          | 1                     | 2                     | 3                     | 4                     | 5                     |                |
| Strongly disagree                                | <input type="radio"/> | Strongly agree |
| <hr/>                                            |                       |                       |                       |                       |                       |                |
| ...is immoral *                                  | 1                     | 2                     | 3                     | 4                     | 5                     |                |
| Strongly disagree                                | <input type="radio"/> | Strongly agree |
| <hr/>                                            |                       |                       |                       |                       |                       |                |

## Image/Post

Please have a detailed look at the following image/post and tick 'I am done' when you finish:

**\***

☐ I am done

## Attention test

Which colors were presented in the last picture? \*

- ☐ Red and Blue/Gey
- ☐ Yellow and Red
- ☐ Black and White
- ☐ Purple and Pink

# Feelings

Rate how positive or negative this post made you feel, ranging from 'sad' to 'happy':

**\***

1 2 3 4 5 6 7 8 9

Sad Happy

Rate how energetic this post made you feel, ranging from 'sleepy/apathetic' to 'excited/energetic': \*

|                  |   |   |   |   |   |   |   |   |   |  |  |  |  |  |  |         |
|------------------|---|---|---|---|---|---|---|---|---|--|--|--|--|--|--|---------|
|                  |   |   |   |   |   |   |   |   |   |  |  |  |  |  |  |         |
|                  | 1 | 2 | 3 | 4 | 5 | 6 | 7 | 8 | 9 |  |  |  |  |  |  |         |
| Sleepy/Apathetic |   |   |   |   |   |   |   |   |   |  |  |  |  |  |  | Excited |

Rate how in control of the situation this post made you feel, ranging from 'no control' to 'completely in control': \*

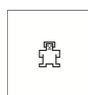

1

2

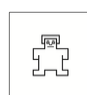

3

4

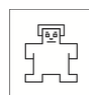

5

6

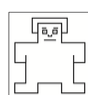

7

8

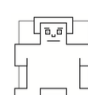

9

**No  
control**

☐☐☐☐☐☐☐☐☐

**Completely  
in control**

## Risk Assessment

After seeing this news post, how much anxiety do you feel in regards to the COVID-19 pandemic?\*

1

2

3

4

5

**No anxiety  
at all**

☐☐☐☐☐

**Very high  
anxiety**

After seeing the news post, how big of a risk do you think the COVID-19 pandemic poses to you or your family?\*

1

2

3

4

5

**No risk at  
all**

☐☐☐☐☐

**Very high  
risk**

Where 'dread' means to be in terror of, or fear intensely, how much do you dread the COVID-19 pandemic after seeing this news post?

\*

1

2

3

4

5

**No dread  
at all**

☐☐☐☐☐

**Very high  
dread**

After seeing the news post, what do you think is your likelihood of infection?\*

1

2

3

4

5

**Very  
unlikely**

☐☐☐☐☐

**Very likely**

After seeing the news post, how harmful do you think it would be if you got infected?\*

1

2

3

4

5

**Not  
harmful at  
all**

☐☐☐☐☐

**Very  
harmful**



## Engagement

**Are you likely to... (check where applicable)?\***

- ☐ Share the post
- ☐ Read the post
- ☐ Comment on the post
- ☐ Ignore the post

- ☐ Share the post
- ☐ Read the post
- ☐ Comment on the post
- ☐ Ignore the post

**Credibility**

... can be trusted \*

1 2 3 4 5

**Strongly disagree** **Strongly agree**

1 2 3 4 5

Strongly disagree Strongly agree

1 2 3 4 5

Strongly disagree Strongly agree

...separates facts from opinion \*

1 2 3 4 5

Strongly disagree Strongly agree



| Response          | 1                     | 2                     | 3                     | 4                     | 5                     |
|-------------------|-----------------------|-----------------------|-----------------------|-----------------------|-----------------------|
| Strongly disagree | <input type="radio"/> |
| Strongly agree    |                       |                       |                       |                       |                       |

...separates facts from opinion \*

1 2 3 4 5

Strongly disagree Strongly agree



| Response          | 1                     | 2                     | 3                     | 4                     | 5                     |
|-------------------|-----------------------|-----------------------|-----------------------|-----------------------|-----------------------|
| Strongly disagree | <input type="radio"/> |
| Strongly agree    |                       |                       |                       |                       |                       |

...is factual \*

1 2 3 4 5

Strongly disagree Strongly agree



| Response          | 1                     | 2                     | 3                     | 4                     | 5                                |
|-------------------|-----------------------|-----------------------|-----------------------|-----------------------|----------------------------------|
| Strongly disagree | <input type="radio"/> | <input type="radio"/> | <input type="radio"/> | <input type="radio"/> | <input checked="" type="radio"/> |

...is factual \*

1 2 3 4 5

Strongly disagree Strongly agree



| Response          | 1                     | 2                     | 3                     | 4                     | 5                                |
|-------------------|-----------------------|-----------------------|-----------------------|-----------------------|----------------------------------|
| Strongly disagree | <input type="radio"/> | <input type="radio"/> | <input type="radio"/> | <input type="radio"/> | <input checked="" type="radio"/> |

...tells the whole story \*

1 2 3 4 5

Strongly disagree Strongly agree



...tells the whole story \*

1 2 3 4 5

Strongly disagree Strongly agree



...is accurate \*

1 2 3 4 5

Strongly disagree Strongly agree

...is accurate \*

1 2 3 4 5

Strongly disagree Strongly agree

...is unbiased \*

1

2

3

4

5

Strongly disagree

☐

☐

☐

☐

☐

Strongly agree

...is fair \*

1

2

3

4

5

Strongly disagree

☐

☐

☐

☐

☐

Strongly agree

... demonstrates concern about public interest \*

1

2

3

4

5

Strongly disagree

☐

☐

☐

☐

☐

Strongly agree

...is sensationalized \*

1

2

3

4

5

Strongly disagree

☐

☐

☐

☐

☐

Strongly agree

...is immoral \*

1

2

3

4

5

Strongly disagree

☐

☐

☐

☐

☐

Strongly agree

Image/Post

Please have a detailed look at the following image/post and tick 'I am done' when you finish:

\*

☐ I am done

Attention test

What was the color of the spikes in the last picture? \*

- ☐ Green
- ☐ Yellow
- ☐ Blue
- ☐ Black

## Feelings

Rate how positive or negative this post made you feel, ranging from 'sad' to 'happy':

\*

|            |                                                                                   |                       |                                                                                   |                       |                                                                                   |                       |                                                                                     |                       |                                                                                     |              |
|------------|-----------------------------------------------------------------------------------|-----------------------|-----------------------------------------------------------------------------------|-----------------------|-----------------------------------------------------------------------------------|-----------------------|-------------------------------------------------------------------------------------|-----------------------|-------------------------------------------------------------------------------------|--------------|
|            | 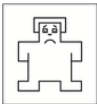 |                       |  |                       |  |                       |  |                       |  |              |
|            | 1                                                                                 | 2                     | 3                                                                                 | 4                     | 5                                                                                 | 6                     | 7                                                                                   | 8                     | 9                                                                                   |              |
| <b>Sad</b> | <input type="radio"/>                                                             | <input type="radio"/> | <input type="radio"/>                                                             | <input type="radio"/> | <input type="radio"/>                                                             | <input type="radio"/> | <input type="radio"/>                                                               | <input type="radio"/> | <input type="radio"/>                                                               | <b>Happy</b> |

Rate how energetic this post made you feel, ranging from 'sleepy/apathetic' to 'excited/energetic' : \*

|                         |                                                                                     |                       |                                                                                     |                       |                                                                                     |                       |                                                                                       |                       |                                                                                       |                |
|-------------------------|-------------------------------------------------------------------------------------|-----------------------|-------------------------------------------------------------------------------------|-----------------------|-------------------------------------------------------------------------------------|-----------------------|---------------------------------------------------------------------------------------|-----------------------|---------------------------------------------------------------------------------------|----------------|
|                         |  |                       |  |                       |  |                       |  |                       |  |                |
|                         | 1                                                                                   | 2                     | 3                                                                                   | 4                     | 5                                                                                   | 6                     | 7                                                                                     | 8                     | 9                                                                                     |                |
| <b>Sleepy/Apathetic</b> | <input type="radio"/>                                                               | <input type="radio"/> | <input type="radio"/>                                                               | <input type="radio"/> | <input type="radio"/>                                                               | <input type="radio"/> | <input type="radio"/>                                                                 | <input type="radio"/> | <input type="radio"/>                                                                 | <b>Excited</b> |

Rate how in control of the situation this post made you feel, ranging from 'no control' to 'completely in control': \*

|                   |                                                                                     |                       |                                                                                     |                       |                                                                                     |                       |                                                                                      |                       |                                                                                       |                              |
|-------------------|-------------------------------------------------------------------------------------|-----------------------|-------------------------------------------------------------------------------------|-----------------------|-------------------------------------------------------------------------------------|-----------------------|--------------------------------------------------------------------------------------|-----------------------|---------------------------------------------------------------------------------------|------------------------------|
|                   |  |                       |  |                       |  |                       |  |                       |  |                              |
|                   | 1                                                                                   | 2                     | 3                                                                                   | 4                     | 5                                                                                   | 6                     | 7                                                                                    | 8                     | 9                                                                                     |                              |
| <b>No control</b> | <input type="radio"/>                                                               | <input type="radio"/> | <input type="radio"/>                                                               | <input type="radio"/> | <input type="radio"/>                                                               | <input type="radio"/> | <input type="radio"/>                                                                | <input type="radio"/> | <input type="radio"/>                                                                 | <b>Completely in control</b> |

## Risk Assessment

After seeing this news post, how much anxiety do you feel in regards to the COVID-19 pandemic?\*

|                          |                       |                       |                       |                       |                       |                          |
|--------------------------|-----------------------|-----------------------|-----------------------|-----------------------|-----------------------|--------------------------|
|                          | 1                     | 2                     | 3                     | 4                     | 5                     |                          |
| <b>No anxiety at all</b> | <input type="radio"/> | <b>Very high anxiety</b> |

After seeing the news post, how big of a risk do you think the COVID-19 pandemic poses to you or your family?\*

|                       |                       |                       |                       |                       |                       |                       |
|-----------------------|-----------------------|-----------------------|-----------------------|-----------------------|-----------------------|-----------------------|
|                       | 1                     | 2                     | 3                     | 4                     | 5                     |                       |
| <b>No risk at all</b> | <input type="radio"/> | <b>Very high risk</b> |

---

Where ‘dread’ means to be in terror of, or fear intensely, how much do you dread the COVID-19 pandemic after seeing this news post?

\*

|                        |                       |                       |                       |                       |                       |                        |
|------------------------|-----------------------|-----------------------|-----------------------|-----------------------|-----------------------|------------------------|
|                        | 1                     | 2                     | 3                     | 4                     | 5                     |                        |
| <b>No dread at all</b> | <input type="radio"/> | <b>Very high dread</b> |

---

After seeing the news post, what do you think is your likelihood of infection?\*

|                      |                       |                       |                       |                       |                       |                    |
|----------------------|-----------------------|-----------------------|-----------------------|-----------------------|-----------------------|--------------------|
|                      | 1                     | 2                     | 3                     | 4                     | 5                     |                    |
| <b>Very unlikely</b> | <input type="radio"/> | <b>Very likely</b> |

---

After seeing the news post, how harmful do you think it would be if you got infected?\*

|                           |                       |                       |                       |                       |                       |                     |
|---------------------------|-----------------------|-----------------------|-----------------------|-----------------------|-----------------------|---------------------|
|                           | 1                     | 2                     | 3                     | 4                     | 5                     |                     |
| <b>Not harmful at all</b> | <input type="radio"/> | <b>Very harmful</b> |

---

## Engagement

Are you likely to... (check where applicable)?\*

- ☐ Share the post
  - ☐ Read the post
  - ☐ Comment on the post
  - ☐ Ignore the post
- 

## Credibility

... can be trusted \*

1

2

3

4

5

Strongly disagree

☐

☐

☐

☐

☐

Strongly agree

...separates facts from opinion \*

1

2

3

4

5

Strongly disagree

☐

☐

☐

☐

☐

Strongly agree

...is factual \*

1

2

3

4

5

Strongly disagree

☐

☐

☐

☐

☐

Strongly agree

...tells the whole story \*

1

2

3

4

5

Strongly disagree

☐

☐

☐

☐

☐

Strongly agree

...is accurate \*

1

2

3

4

5

Strongly disagree

☐

☐

☐

☐

☐

Strongly agree

...is unbiased \*

1

2

3

4

5

Strongly disagree

☐

☐

☐

☐

☐

Strongly agree

...is fair \*

1

2

3

4

5

Strongly disagree

☐

☐

☐

☐

☐

Strongly agree

... demonstrates concern about public interest \*

|                          |                       |                       |                       |                       |                       |                       |
|--------------------------|-----------------------|-----------------------|-----------------------|-----------------------|-----------------------|-----------------------|
|                          | 1                     | 2                     | 3                     | 4                     | 5                     |                       |
| <b>Strongly disagree</b> | <input type="radio"/> | <b>Strongly agree</b> |

---

...is sensationalized \*

|                          |                       |                       |                       |                       |                       |                       |
|--------------------------|-----------------------|-----------------------|-----------------------|-----------------------|-----------------------|-----------------------|
|                          | 1                     | 2                     | 3                     | 4                     | 5                     |                       |
| <b>Strongly disagree</b> | <input type="radio"/> | <b>Strongly agree</b> |

---

...is immoral \*

|                          |                       |                       |                       |                       |                       |                       |
|--------------------------|-----------------------|-----------------------|-----------------------|-----------------------|-----------------------|-----------------------|
|                          | 1                     | 2                     | 3                     | 4                     | 5                     |                       |
| <b>Strongly disagree</b> | <input type="radio"/> | <b>Strongly agree</b> |

---

## Image/Post

Please have a detailed look at the following image/post and tick 'I am done' when you finish:

\*

☐ I am done

---

## Attention test

For what amount of time did the picture advice you to wash hands? \*

- ☐ 10 seconds
  - ☐ 20 seconds
  - ☐ 40 seconds
  - ☐ 60 seconds
- 

## Feelings

Rate how positive or negative this post made you feel, ranging from 'sad' to 'happy':

\*

|     |                                                                                   |                       |                       |                                                                                   |                       |                       |                                                                                   |                       |                       |                                                                                     |  |  |                                                                                     |       |
|-----|-----------------------------------------------------------------------------------|-----------------------|-----------------------|-----------------------------------------------------------------------------------|-----------------------|-----------------------|-----------------------------------------------------------------------------------|-----------------------|-----------------------|-------------------------------------------------------------------------------------|--|--|-------------------------------------------------------------------------------------|-------|
|     |  |                       |                       |  |                       |                       |  |                       |                       |  |  |  |  |       |
|     | 1                                                                                 | 2                     | 3                     | 4                                                                                 | 5                     | 6                     | 7                                                                                 | 8                     | 9                     |                                                                                     |  |  |                                                                                     |       |
| Sad | <input type="radio"/>                                                             | <input type="radio"/> | <input type="radio"/> | <input type="radio"/>                                                             | <input type="radio"/> | <input type="radio"/> | <input type="radio"/>                                                             | <input type="radio"/> | <input type="radio"/> |                                                                                     |  |  | <input type="radio"/>                                                               | Happy |

Rate how energetic this post made you feel, ranging from 'sleepy/apathetic' to 'excited/energetic': \*

|                  |                                                                                   |                       |                       |                                                                                   |                       |                       |                                                                                   |                       |                       |                                                                                     |  |  |                                                                                     |         |
|------------------|-----------------------------------------------------------------------------------|-----------------------|-----------------------|-----------------------------------------------------------------------------------|-----------------------|-----------------------|-----------------------------------------------------------------------------------|-----------------------|-----------------------|-------------------------------------------------------------------------------------|--|--|-------------------------------------------------------------------------------------|---------|
|                  |  |                       |                       |  |                       |                       |  |                       |                       |  |  |  |  |         |
|                  | 1                                                                                 | 2                     | 3                     | 4                                                                                 | 5                     | 6                     | 7                                                                                 | 8                     | 9                     |                                                                                     |  |  |                                                                                     |         |
| Sleepy/Apathetic | <input type="radio"/>                                                             | <input type="radio"/> | <input type="radio"/> | <input type="radio"/>                                                             | <input type="radio"/> | <input type="radio"/> | <input type="radio"/>                                                             | <input type="radio"/> | <input type="radio"/> |                                                                                     |  |  | <input type="radio"/>                                                               | Excited |

Rate how in control of the situation this post made you feel, ranging from 'no control' to 'completely in control': \*

|            |                                                                                   |                       |                       |                                                                                   |                       |                       |                                                                                   |                       |                       |                                                                                    |  |  |                                                                                     |                       |
|------------|-----------------------------------------------------------------------------------|-----------------------|-----------------------|-----------------------------------------------------------------------------------|-----------------------|-----------------------|-----------------------------------------------------------------------------------|-----------------------|-----------------------|------------------------------------------------------------------------------------|--|--|-------------------------------------------------------------------------------------|-----------------------|
|            |  |                       |                       |  |                       |                       |  |                       |                       |  |  |  |  |                       |
|            | 1                                                                                 | 2                     | 3                     | 4                                                                                 | 5                     | 6                     | 7                                                                                 | 8                     | 9                     |                                                                                    |  |  |                                                                                     |                       |
| No control | <input type="radio"/>                                                             | <input type="radio"/> | <input type="radio"/> | <input type="radio"/>                                                             | <input type="radio"/> | <input type="radio"/> | <input type="radio"/>                                                             | <input type="radio"/> | <input type="radio"/> |                                                                                    |  |  | <input type="radio"/>                                                               | Completely in control |

## Risk Assessment

After seeing this news post, how much anxiety do you feel in regards to the COVID-19 pandemic?\*

|                   |                       |                       |                       |                       |                       |                   |
|-------------------|-----------------------|-----------------------|-----------------------|-----------------------|-----------------------|-------------------|
|                   | 1                     | 2                     | 3                     | 4                     | 5                     |                   |
| No anxiety at all | <input type="radio"/> | Very high anxiety |

After seeing the news post, how big of a risk do you think the COVID-19 pandemic poses to you or your family?\*

|                |                       |                       |                       |                       |                       |                |
|----------------|-----------------------|-----------------------|-----------------------|-----------------------|-----------------------|----------------|
|                | 1                     | 2                     | 3                     | 4                     | 5                     |                |
| No risk at all | <input type="radio"/> | Very high risk |

**\***

After seeing the news post, what do you think is your likelihood of infection?\*

After seeing the news post, how harmful do you think it would be if you got infected?\*

## Engagement

**Are you likely to... (check where applicable)?\***

## Credibility

... can be trusted \*

[illegible]



|                                                  |                       |                       |                       |                       |                       |                |
|--------------------------------------------------|-----------------------|-----------------------|-----------------------|-----------------------|-----------------------|----------------|
| ...separates facts from opinion *                |                       |                       |                       |                       |                       |                |
|                                                  | 1                     | 2                     | 3                     | 4                     | 5                     |                |
| Strongly disagree                                | <input type="radio"/> | Strongly agree |
| ...is factual *                                  |                       |                       |                       |                       |                       |                |
|                                                  | 1                     | 2                     | 3                     | 4                     | 5                     |                |
| Strongly disagree                                | <input type="radio"/> | Strongly agree |
| ...tells the whole story *                       |                       |                       |                       |                       |                       |                |
|                                                  | 1                     | 2                     | 3                     | 4                     | 5                     |                |
| Strongly disagree                                | <input type="radio"/> | Strongly agree |
| ...is accurate *                                 |                       |                       |                       |                       |                       |                |
|                                                  | 1                     | 2                     | 3                     | 4                     | 5                     |                |
| Strongly disagree                                | <input type="radio"/> | Strongly agree |
| ...is unbiased *                                 |                       |                       |                       |                       |                       |                |
|                                                  | 1                     | 2                     | 3                     | 4                     | 5                     |                |
| Strongly disagree                                | <input type="radio"/> | Strongly agree |
| ...is fair *                                     |                       |                       |                       |                       |                       |                |
|                                                  | 1                     | 2                     | 3                     | 4                     | 5                     |                |
| Strongly disagree                                | <input type="radio"/> | Strongly agree |
| ... demonstrates concern about public interest * |                       |                       |                       |                       |                       |                |
|                                                  | 1                     | 2                     | 3                     | 4                     | 5                     |                |
| Strongly disagree                                | <input type="radio"/> | Strongly agree |

|                   |                       |                       |                       |                       |                       |                |
|-------------------|-----------------------|-----------------------|-----------------------|-----------------------|-----------------------|----------------|
|                   | 1                     | 2                     | 3                     | 4                     | 5                     |                |
| Strongly disagree | <input type="radio"/> | Strongly agree |

|                          | 1                     | 2                     | 3                     | 4                     | 5                     |                       |
|--------------------------|-----------------------|-----------------------|-----------------------|-----------------------|-----------------------|-----------------------|
| <b>Strongly disagree</b> | <input type="radio"/> | <b>Strongly agree</b> |

\*

**\***

# Happy



After seeing the news post, how harmful do you think it would be if you got infected?\*

|                    |                       |                       |                       |                       |                       |              |
|--------------------|-----------------------|-----------------------|-----------------------|-----------------------|-----------------------|--------------|
|                    | 1                     | 2                     | 3                     | 4                     | 5                     |              |
| Not harmful at all | <input type="radio"/> | Very harmful |

Engagement

Are you likely to... (check where applicable)?\*

- ☐ Share the post
- ☐ Read the post
- ☐ Comment on the post
- ☐ Ignore the post

Credibility

... can be trusted \*

|                   |                       |                       |                       |                       |                       |                |
|-------------------|-----------------------|-----------------------|-----------------------|-----------------------|-----------------------|----------------|
|                   | 1                     | 2                     | 3                     | 4                     | 5                     |                |
| Strongly disagree | <input type="radio"/> | Strongly agree |

...separates facts from opinion \*

|                   |                       |                       |                       |                       |                       |                |
|-------------------|-----------------------|-----------------------|-----------------------|-----------------------|-----------------------|----------------|
|                   | 1                     | 2                     | 3                     | 4                     | 5                     |                |
| Strongly disagree | <input type="radio"/> | Strongly agree |

...is factual \*

|                   |                       |                       |                       |                       |                       |                |
|-------------------|-----------------------|-----------------------|-----------------------|-----------------------|-----------------------|----------------|
|                   | 1                     | 2                     | 3                     | 4                     | 5                     |                |
| Strongly disagree | <input type="radio"/> | Strongly agree |

...tells the whole story \*

1

2

3

4

5

Strongly disagree

☐

☐

☐

☐

☐

Strongly agree

...is accurate \*

1

2

3

4

5

Strongly disagree

☐

☐

☐

☐

☐

Strongly agree

...is unbiased \*

1

2

3

4

5

Strongly disagree

☐

☐

☐

☐

☐

Strongly agree

...is fair \*

1

2

3

4

5

Strongly disagree

☐

☐

☐

☐

☐

Strongly agree

... demonstrates concern about public interest \*

1

2

3

4

5

Strongly disagree

☐

☐

☐

☐

☐

Strongly agree

...is sensationalized \*

1

2

3

4

5

Strongly disagree

☐

☐

☐

☐

☐

Strongly agree

...is immoral \*

1

2

3

4

5

Strongly disagree

☐

☐

☐

☐

☐

Strongly agree

## Image/Post

Please have a detailed look at the following image/post and tick 'I am done' when you finish:

\*

☐ I am done

## Attention test

What was the rightmost recommendation in the last picture?

- ☐ Wash your hands
- ☐ Keep your distance
- ☐ Wear a face covering

## Feelings

Rate how positive or negative this post made you feel, ranging from '**sad**' to '**happy**':

\*

|     |                                                                                     |                       |                       |                                                                                     |                       |                       |                                                                                     |                       |                       |                                                                                       |  |  |                                                                                       |       |
|-----|-------------------------------------------------------------------------------------|-----------------------|-----------------------|-------------------------------------------------------------------------------------|-----------------------|-----------------------|-------------------------------------------------------------------------------------|-----------------------|-----------------------|---------------------------------------------------------------------------------------|--|--|---------------------------------------------------------------------------------------|-------|
|     |  |                       |                       |  |                       |                       |  |                       |                       |  |  |  |  |       |
|     | 1                                                                                   | 2                     | 3                     | 4                                                                                   | 5                     | 6                     | 7                                                                                   | 8                     | 9                     |                                                                                       |  |  |                                                                                       |       |
| Sad | <input type="radio"/>                                                               | <input type="radio"/> | <input type="radio"/> | <input type="radio"/>                                                               | <input type="radio"/> | <input type="radio"/> | <input type="radio"/>                                                               | <input type="radio"/> | <input type="radio"/> |                                                                                       |  |  |                                                                                       | Happy |

Rate how energetic this post made you feel, ranging from '**sleepy/apathetic**' to '**excited/energetic**': \*

|                  |  |                                                                                     |                       |                       |                                                                                     |                       |                       |                                                                                     |                       |                       |                                                                                       |  |  |                                                                                       |  |
|------------------|--|-------------------------------------------------------------------------------------|-----------------------|-----------------------|-------------------------------------------------------------------------------------|-----------------------|-----------------------|-------------------------------------------------------------------------------------|-----------------------|-----------------------|---------------------------------------------------------------------------------------|--|--|---------------------------------------------------------------------------------------|--|
|                  |  |  |                       |                       |  |                       |                       |  |                       |                       |  |  |  |  |  |
|                  |  | 1                                                                                   | 2                     | 3                     | 4                                                                                   | 5                     | 6                     | 7                                                                                   | 8                     | 9                     |                                                                                       |  |  |                                                                                       |  |
| Sleepy/Apathetic |  | <input type="radio"/>                                                               | <input type="radio"/> | <input type="radio"/> | <input type="radio"/>                                                               | <input type="radio"/> | <input type="radio"/> | <input type="radio"/>                                                               | <input type="radio"/> | <input type="radio"/> |                                                                                       |  |  | Excited                                                                               |  |

Rate how in control of the situation this post made you feel, ranging from '**no control**' to '**completely in control**': \*

|            |                                                                                     |                       |                       |                                                                                     |                       |                       |                                                                                     |                       |                       |                                                                                      |  |  |                                                                                       |                       |
|------------|-------------------------------------------------------------------------------------|-----------------------|-----------------------|-------------------------------------------------------------------------------------|-----------------------|-----------------------|-------------------------------------------------------------------------------------|-----------------------|-----------------------|--------------------------------------------------------------------------------------|--|--|---------------------------------------------------------------------------------------|-----------------------|
|            |  |                       |                       |  |                       |                       |  |                       |                       |  |  |  |  |                       |
|            | 1                                                                                   | 2                     | 3                     | 4                                                                                   | 5                     | 6                     | 7                                                                                   | 8                     | 9                     |                                                                                      |  |  |                                                                                       |                       |
| No control | <input type="radio"/>                                                               | <input type="radio"/> | <input type="radio"/> | <input type="radio"/>                                                               | <input type="radio"/> | <input type="radio"/> | <input type="radio"/>                                                               | <input type="radio"/> | <input type="radio"/> |                                                                                      |  |  |                                                                                       | Completely in control |

## Risk Assessment

After seeing this news post, how much anxiety do you feel in regards to the COVID-19 pandemic?\*

|                          |                       |                       |                       |                       |                       |                          |
|--------------------------|-----------------------|-----------------------|-----------------------|-----------------------|-----------------------|--------------------------|
|                          | 1                     | 2                     | 3                     | 4                     | 5                     |                          |
| <b>No anxiety at all</b> | <input type="radio"/> | <b>Very high anxiety</b> |

---

After seeing the news post, how big of a risk do you think the COVID-19 pandemic poses to you or your family?\*

|                       |                       |                       |                       |                       |                       |                       |
|-----------------------|-----------------------|-----------------------|-----------------------|-----------------------|-----------------------|-----------------------|
|                       | 1                     | 2                     | 3                     | 4                     | 5                     |                       |
| <b>No risk at all</b> | <input type="radio"/> | <b>Very high risk</b> |

---

Where 'dread' means to be in terror of, or fear intensely, how much do you dread the COVID-19 pandemic after seeing this news post?

\*

|                        |                       |                       |                       |                       |                       |                        |
|------------------------|-----------------------|-----------------------|-----------------------|-----------------------|-----------------------|------------------------|
|                        | 1                     | 2                     | 3                     | 4                     | 5                     |                        |
| <b>No dread at all</b> | <input type="radio"/> | <b>Very high dread</b> |

---

After seeing the news post, what do you think is your likelihood of infection?\*

|                      |                       |                       |                       |                       |                       |                    |
|----------------------|-----------------------|-----------------------|-----------------------|-----------------------|-----------------------|--------------------|
|                      | 1                     | 2                     | 3                     | 4                     | 5                     |                    |
| <b>Very unlikely</b> | <input type="radio"/> | <b>Very likely</b> |

---

After seeing the news post, how harmful do you think it would be if you got infected?\*

|                           |                       |                       |                       |                       |                       |                     |
|---------------------------|-----------------------|-----------------------|-----------------------|-----------------------|-----------------------|---------------------|
|                           | 1                     | 2                     | 3                     | 4                     | 5                     |                     |
| <b>Not harmful at all</b> | <input type="radio"/> | <b>Very harmful</b> |

---

## Engagement

- ☐ Share the post
- ☐ Read the post
- ☐ Comment on the post
- ☐ Ignore the post

... can be trusted \*

|                          |                       |                       |                       |                       |                       |                       |
|--------------------------|-----------------------|-----------------------|-----------------------|-----------------------|-----------------------|-----------------------|
|                          | 1                     | 2                     | 3                     | 4                     | 5                     |                       |
| <b>Strongly disagree</b> | <input type="radio"/> | <b>Strongly agree</b> |

|                          |                       |                       |                       |                       |                       |                       |
|--------------------------|-----------------------|-----------------------|-----------------------|-----------------------|-----------------------|-----------------------|
|                          | 1                     | 2                     | 3                     | 4                     | 5                     |                       |
| <b>Strongly disagree</b> | <input type="radio"/> | <b>Strongly agree</b> |

[illegible][illegible][illegible]



...is unbiased \*

1

2

3

4

5

Strongly disagree

☐

☐

☐

☐

☐

Strongly agree

...is fair \*

1

2

3

4

5

Strongly disagree

☐

☐

☐

☐

☐

Strongly agree

... demonstrates concern about public interest \*

1

2

3

4

5

Strongly disagree

☐

☐

☐

☐

☐

Strongly agree

...is sensationalized \*

1

2

3

4

5

Strongly disagree

☐

☐

☐

☐

☐

Strongly agree

...is immoral \*

1

2

3

4

5

Strongly disagree

☐

☐

☐

☐

☐

Strongly agree

Image/Post

Please have a detailed look at the following image/post and tick 'I am done' when you finish:

\*

☐ I am done

Attention test

- ☐ February and April
- ☐ October and December
- ☐ January and September

**\***

|                          | 1                     | 2                     | 3                     | 4                     | 5                     |                          |
|--------------------------|-----------------------|-----------------------|-----------------------|-----------------------|-----------------------|--------------------------|
| <b>No anxiety at all</b> | <input type="radio"/> | <b>Very high anxiety</b> |

After seeing the news post, how big of a risk do you think the COVID-19 pandemic poses to you or your family?\*

|                       |                       |                       |                       |                       |                       |                       |
|-----------------------|-----------------------|-----------------------|-----------------------|-----------------------|-----------------------|-----------------------|
|                       | 1                     | 2                     | 3                     | 4                     | 5                     |                       |
| <b>No risk at all</b> | <input type="radio"/> | <b>Very high risk</b> |

---

Where ‘dread’ means to be in terror of, or fear intensely, how much do you dread the COVID-19 pandemic after seeing this news post?

\*

|                        |                       |                       |                       |                       |                       |                        |
|------------------------|-----------------------|-----------------------|-----------------------|-----------------------|-----------------------|------------------------|
|                        | 1                     | 2                     | 3                     | 4                     | 5                     |                        |
| <b>No dread at all</b> | <input type="radio"/> | <b>Very high dread</b> |

---

After seeing the news post, what do you think is your likelihood of infection?\*

|                      |                       |                       |                       |                       |                       |                    |
|----------------------|-----------------------|-----------------------|-----------------------|-----------------------|-----------------------|--------------------|
|                      | 1                     | 2                     | 3                     | 4                     | 5                     |                    |
| <b>Very unlikely</b> | <input type="radio"/> | <b>Very likely</b> |

---

After seeing the news post, how harmful do you think it would be if you got infected?\*

|                           |                       |                       |                       |                       |                       |                     |
|---------------------------|-----------------------|-----------------------|-----------------------|-----------------------|-----------------------|---------------------|
|                           | 1                     | 2                     | 3                     | 4                     | 5                     |                     |
| <b>Not harmful at all</b> | <input type="radio"/> | <b>Very harmful</b> |

---

## Engagement

Are you likely to... (check where applicable)?\*

- ☐ Share the post
  - ☐ Read the post
  - ☐ Comment on the post
  - ☐ Ignore the post
- 

## Credibility

... can be trusted \*

1

2

3

4

5

Strongly disagree

☐

☐

☐

☐

☐

Strongly agree

...separates facts from opinion \*

1

2

3

4

5

Strongly disagree

☐

☐

☐

☐

☐

Strongly agree

...is factual \*

1

2

3

4

5

Strongly disagree

☐

☐

☐

☐

☐

Strongly agree

...tells the whole story \*

1

2

3

4

5

Strongly disagree

☐

☐

☐

☐

☐

Strongly agree

...is accurate \*

1

2

3

4

5

Strongly disagree

☐

☐

☐

☐

☐

Strongly agree

...is unbiased \*

1

2

3

4

5

Strongly disagree

☐

☐

☐

☐

☐

Strongly agree

...is fair \*

1

2

3

4

5

Strongly disagree

☐

☐

☐

☐

☐

Strongly agree

... demonstrates concern about public interest \*

|                          | 1                     | 2                     | 3                     | 4                     | 5                     |                       |
|--------------------------|-----------------------|-----------------------|-----------------------|-----------------------|-----------------------|-----------------------|
| <b>Strongly disagree</b> | <input type="radio"/> | <b>Strongly agree</b> |

---

...is sensationalized \*

|                          | 1                     | 2                     | 3                     | 4                     | 5                     |                       |
|--------------------------|-----------------------|-----------------------|-----------------------|-----------------------|-----------------------|-----------------------|
| <b>Strongly disagree</b> | <input type="radio"/> | <b>Strongly agree</b> |

---

...is immoral \*

|                          | 1                     | 2                     | 3                     | 4                     | 5                     |                       |
|--------------------------|-----------------------|-----------------------|-----------------------|-----------------------|-----------------------|-----------------------|
| <b>Strongly disagree</b> | <input type="radio"/> | <b>Strongly agree</b> |

---

## Image/Post

Please have a detailed look at the following image/post and tick 'I am done' when you finish:

\*

☐ I am done

---

## Attention test

What was the chart about in the last picture? \*

- ☐ Deaths with cancer and other deaths
  - ☐ Deaths with covid-19 and other deaths
  - ☐ Survivals from covid-19
  - ☐ Survivals from cancer
- 

## Feelings

Rate how positive or negative this post made you feel, ranging from 'sad' to 'happy':

\*

|     |                                                                                   |                       |                       |                                                                                   |                       |                       |                                                                                   |                       |                       |                                                                                     |  |  |                                                                                     |       |
|-----|-----------------------------------------------------------------------------------|-----------------------|-----------------------|-----------------------------------------------------------------------------------|-----------------------|-----------------------|-----------------------------------------------------------------------------------|-----------------------|-----------------------|-------------------------------------------------------------------------------------|--|--|-------------------------------------------------------------------------------------|-------|
|     |  |                       |                       |  |                       |                       |  |                       |                       |  |  |  |  |       |
|     | 1                                                                                 | 2                     | 3                     | 4                                                                                 | 5                     | 6                     | 7                                                                                 | 8                     | 9                     |                                                                                     |  |  |                                                                                     |       |
| Sad | <input type="radio"/>                                                             | <input type="radio"/> | <input type="radio"/> | <input type="radio"/>                                                             | <input type="radio"/> | <input type="radio"/> | <input type="radio"/>                                                             | <input type="radio"/> | <input type="radio"/> |                                                                                     |  |  | <input type="radio"/>                                                               | Happy |

Rate how energetic this post made you feel, ranging from 'sleepy/apathetic' to 'excited/energetic': \*

|                  |                                                                                   |                       |                       |                                                                                   |                       |                       |                                                                                   |                       |                       |                                                                                     |  |  |                                                                                     |         |
|------------------|-----------------------------------------------------------------------------------|-----------------------|-----------------------|-----------------------------------------------------------------------------------|-----------------------|-----------------------|-----------------------------------------------------------------------------------|-----------------------|-----------------------|-------------------------------------------------------------------------------------|--|--|-------------------------------------------------------------------------------------|---------|
|                  |  |                       |                       |  |                       |                       |  |                       |                       |  |  |  |  |         |
|                  | 1                                                                                 | 2                     | 3                     | 4                                                                                 | 5                     | 6                     | 7                                                                                 | 8                     | 9                     |                                                                                     |  |  |                                                                                     |         |
| Sleepy/Apathetic | <input type="radio"/>                                                             | <input type="radio"/> | <input type="radio"/> | <input type="radio"/>                                                             | <input type="radio"/> | <input type="radio"/> | <input type="radio"/>                                                             | <input type="radio"/> | <input type="radio"/> |                                                                                     |  |  | <input type="radio"/>                                                               | Excited |

Rate how in control of the situation this post made you feel, ranging from 'no control' to 'completely in control': \*

|            |                                                                                   |                       |                       |                                                                                   |                       |                       |                                                                                   |                       |                       |                                                                                    |  |  |                                                                                     |                       |
|------------|-----------------------------------------------------------------------------------|-----------------------|-----------------------|-----------------------------------------------------------------------------------|-----------------------|-----------------------|-----------------------------------------------------------------------------------|-----------------------|-----------------------|------------------------------------------------------------------------------------|--|--|-------------------------------------------------------------------------------------|-----------------------|
|            |  |                       |                       |  |                       |                       |  |                       |                       |  |  |  |  |                       |
|            | 1                                                                                 | 2                     | 3                     | 4                                                                                 | 5                     | 6                     | 7                                                                                 | 8                     | 9                     |                                                                                    |  |  |                                                                                     |                       |
| No control | <input type="radio"/>                                                             | <input type="radio"/> | <input type="radio"/> | <input type="radio"/>                                                             | <input type="radio"/> | <input type="radio"/> | <input type="radio"/>                                                             | <input type="radio"/> | <input type="radio"/> |                                                                                    |  |  | <input type="radio"/>                                                               | Completely in control |

## Risk Assessment

After seeing this news post, how much anxiety do you feel in regards to the COVID-19 pandemic?\*

|                   |                       |                       |                       |                       |                       |                   |
|-------------------|-----------------------|-----------------------|-----------------------|-----------------------|-----------------------|-------------------|
|                   | 1                     | 2                     | 3                     | 4                     | 5                     |                   |
| No anxiety at all | <input type="radio"/> | Very high anxiety |

After seeing the news post, how big of a risk do you think the COVID-19 pandemic poses to you or your family?\*

|                |                       |                       |                       |                       |                       |                |
|----------------|-----------------------|-----------------------|-----------------------|-----------------------|-----------------------|----------------|
|                | 1                     | 2                     | 3                     | 4                     | 5                     |                |
| No risk at all | <input type="radio"/> | Very high risk |

**\***

After seeing the news post, what do you think is your likelihood of infection?\*

After seeing the news post, how harmful do you think it would be if you got infected?\*

## Engagement

**Are you likely to... (check where applicable)?\***

## Credibility

... can be trusted \*

[illegible]

|                                                  |                       |                       |                       |                       |                       |                |
|--------------------------------------------------|-----------------------|-----------------------|-----------------------|-----------------------|-----------------------|----------------|
| ...separates facts from opinion *                |                       |                       |                       |                       |                       |                |
|                                                  | 1                     | 2                     | 3                     | 4                     | 5                     |                |
| Strongly disagree                                | <input type="radio"/> | Strongly agree |
| ...is factual *                                  |                       |                       |                       |                       |                       |                |
|                                                  | 1                     | 2                     | 3                     | 4                     | 5                     |                |
| Strongly disagree                                | <input type="radio"/> | Strongly agree |
| ...tells the whole story *                       |                       |                       |                       |                       |                       |                |
|                                                  | 1                     | 2                     | 3                     | 4                     | 5                     |                |
| Strongly disagree                                | <input type="radio"/> | Strongly agree |
| ...is accurate *                                 |                       |                       |                       |                       |                       |                |
|                                                  | 1                     | 2                     | 3                     | 4                     | 5                     |                |
| Strongly disagree                                | <input type="radio"/> | Strongly agree |
| ...is unbiased *                                 |                       |                       |                       |                       |                       |                |
|                                                  | 1                     | 2                     | 3                     | 4                     | 5                     |                |
| Strongly disagree                                | <input type="radio"/> | Strongly agree |
| ...is fair *                                     |                       |                       |                       |                       |                       |                |
|                                                  | 1                     | 2                     | 3                     | 4                     | 5                     |                |
| Strongly disagree                                | <input type="radio"/> | Strongly agree |
| ... demonstrates concern about public interest * |                       |                       |                       |                       |                       |                |
|                                                  | 1                     | 2                     | 3                     | 4                     | 5                     |                |
| Strongly disagree                                | <input type="radio"/> | Strongly agree |



|                          |                       |                       |                       |                       |                       |                       |
|--------------------------|-----------------------|-----------------------|-----------------------|-----------------------|-----------------------|-----------------------|
|                          | 1                     | 2                     | 3                     | 4                     | 5                     |                       |
| <b>Strongly disagree</b> | <input type="radio"/> | <b>Strongly agree</b> |

|                          | 1                     | 2                     | 3                     | 4                     | 5                     |                       |
|--------------------------|-----------------------|-----------------------|-----------------------|-----------------------|-----------------------|-----------------------|
| <b>Strongly disagree</b> | <input type="radio"/> | <b>Strongly agree</b> |

\*

\*

1 2 3 4 5 6 7 8 9

○ ○ ○ ○ ○ ○ ○ ○ ○ Happy

Rate how energetic this post made you feel, ranging from 'sleepy/apathetic' to 'excited/energetic' : \*

1 2 3 4 5 6 7 8 9

**Sleepy/Apathetic**          **Excited**

Rate how in control of the situation this post made you feel, ranging from 'no control' to 'completely in control': \*

Figure 1: A 9-point Likert scale for the degree of control over the environment. The scale ranges from 1 (No control) to 9 (Completely in control). The scale is represented by a series of nine squares, each containing a number and a corresponding icon of a person in a wheelchair. The icons show increasing levels of control over the environment, from a person in a wheelchair with no control (1) to a person in a wheelchair with complete control (9).

## Risk Assessment

After seeing this news post, how much anxiety do you feel in regards to the COVID-19 pandemic?\*

|                          | 1                     | 2                     | 3                     | 4                     | 5                     |                          |
|--------------------------|-----------------------|-----------------------|-----------------------|-----------------------|-----------------------|--------------------------|
| <b>No anxiety at all</b> | <input type="radio"/> | <b>Very high anxiety</b> |

After seeing the news post, how big of a risk do you think the COVID-19 pandemic poses to you or your family?\*

|                |   |   |   |   |   |                |
|----------------|---|---|---|---|---|----------------|
|                | 1 | 2 | 3 | 4 | 5 |                |
| No risk at all |   |   |   |   |   | Very high risk |

Where 'dread' means to be in terror of, or fear intensely, how much do you dread the COVID-19 pandemic after seeing this news post?

**\***

|                 |   |   |   |   |   |                 |
|-----------------|---|---|---|---|---|-----------------|
|                 | 1 | 2 | 3 | 4 | 5 |                 |
| No dread at all |   |   |   |   |   | Very high dread |

After seeing the news post, what do you think is your likelihood of infection?\*

|                      | 1                                                                                   | 2                                                                                   | 3                                                                                   | 4                                                                                   | 5                                                                                   |                    |
|----------------------|-------------------------------------------------------------------------------------|-------------------------------------------------------------------------------------|-------------------------------------------------------------------------------------|-------------------------------------------------------------------------------------|-------------------------------------------------------------------------------------|--------------------|
| <b>Very unlikely</b> |  |  |  |  |  | <b>Very likely</b> |

[illegible]

**Are you likely to... (check where applicable)?\***

- Credibility
- ... can be trusted \*
- 1 2 3 4 5
- Strongly disagree Strongly agree
- 

1 2 3 4 5

Strongly disagree Strongly agree

Strongly disagree      1      2      3      4      5      Strongly agree

|                                                  |                       |                       |                       |                       |                       |                |
|--------------------------------------------------|-----------------------|-----------------------|-----------------------|-----------------------|-----------------------|----------------|
| ...tells the whole story *                       | 1                     | 2                     | 3                     | 4                     | 5                     |                |
| Strongly disagree                                | <input type="radio"/> | Strongly agree |
| <hr/>                                            |                       |                       |                       |                       |                       |                |
| ...is accurate *                                 | 1                     | 2                     | 3                     | 4                     | 5                     |                |
| Strongly disagree                                | <input type="radio"/> | Strongly agree |
| <hr/>                                            |                       |                       |                       |                       |                       |                |
| ...is unbiased *                                 | 1                     | 2                     | 3                     | 4                     | 5                     |                |
| Strongly disagree                                | <input type="radio"/> | Strongly agree |
| <hr/>                                            |                       |                       |                       |                       |                       |                |
| ...is fair *                                     | 1                     | 2                     | 3                     | 4                     | 5                     |                |
| Strongly disagree                                | <input type="radio"/> | Strongly agree |
| <hr/>                                            |                       |                       |                       |                       |                       |                |
| ... demonstrates concern about public interest * | 1                     | 2                     | 3                     | 4                     | 5                     |                |
| Strongly disagree                                | <input type="radio"/> | Strongly agree |
| <hr/>                                            |                       |                       |                       |                       |                       |                |
| ...is sensationalized *                          | 1                     | 2                     | 3                     | 4                     | 5                     |                |
| Strongly disagree                                | <input type="radio"/> | Strongly agree |
| <hr/>                                            |                       |                       |                       |                       |                       |                |
| ...is immoral *                                  | 1                     | 2                     | 3                     | 4                     | 5                     |                |
| Strongly disagree                                | <input type="radio"/> | Strongly agree |
| <hr/>                                            |                       |                       |                       |                       |                       |                |

# Demographic Information and Internet Usage Habits

**Your Age: \***

**Your Gender: \***

- ☐ Male
- ☐ Female

**What is the highest degree or education level you have completed:\***

- ☐ High School
- ☐ Bachelor's degree
- ☐ Master's degree
- ☐ Ph.D or higher
- ☐ Prefer not to say
- ☐ None

**Which of the following social media do you use? \***

- ☐ Facebook
- ☐ Instagram
- ☐ Twitter
- ☐ YouTube
- ☐ LinkedIn
- ☐ Other - Write In (Required)

\*

**How many hours per day do you spend on social media? \***

What is your main source of news about the world? \*

- ☐ Television
- ☐ News websites
- ☐ Social media
- ☐ Newspaper
- ☐ Podcasts
- ☐ Radio
- ☐ Other - Write In (Required)

---

How active are you on social media through commenting, sharing, liking or posting content? \*

|                              |                       |                       |                       |                       |                       |                             |
|------------------------------|-----------------------|-----------------------|-----------------------|-----------------------|-----------------------|-----------------------------|
|                              | 1                     | 2                     | 3                     | 4                     | 5                     |                             |
| <b>Not active<br/>at all</b> | <input type="radio"/> | <b>Extremely<br/>active</b> |

---

Thank You!

Thank you for taking our survey. Your response is very important to us.

Here is your completion code: [question('value'), id='301']

---
